# Supplementary material for: Comparison of Poly-A+ Selection and rRNA Depletion in Detection of lncRNA in Two Equine Tissues Using RNA-seq
Source: Noncoding RNA. 2020 Aug 21;6(3):32. doi: 10.3390/ncrna6030032 (PMC7549351; doi:10.3390/ncrna6030032)
Supplement: Supplementary file 1 [file ncrna-06-00032-s001.zip › Copy of Table S3_raw_edgeR.xlsx]

## Sheet: raw_polyA
polyA-selection					rRNA-depletion
Transcript	logFC	logCPM	PValue		Transcript	logFC	logCPM	PValue
sp|O00370|LORF2_HUMAN	0.300343	7.3048	0.969855		sp|O00370|LORF2_HUMAN	-2.07864	7.3048	0.656827
STRG.5.1	-4.89108	6.30671	0.359563		STRG.5.1	0	6.30671	1
STRG.18.1	-4.46236	6.48122	0.437466		STRG.18.1	-3.89852	6.48122	0.58267
STRG.19.1	0.999896	6.45467	0.845318		STRG.19.1	0	6.45467	1
rna126	1.14191	8.03825	0.724577		rna126	1.77814	8.03825	0.665031
rna129	-1.20669	6.38564	0.738665		rna129	0	6.38564	1
rna130	0.918051	6.5187	0.845318		rna130	-2.48517	6.5187	1
STRG.43.1	-4.59578	6.26798	0.393594		STRG.43.1	1.36087	6.26798	1
rna298	-5.07238	7.0171	0.33224		rna298	-5.39711	7.0171	0.290777
rna791	-6.62337	7.53236	0.170577		rna791	-5.60422	7.53236	0.260517
rna1339	-2.90636	6.03796	0.72178		rna1339	-1.83081	6.03796	1
rna2649	-6.17707	7.2215	0.210781		rna2649	-5.10922	7.2215	0.33224
rna2651	-0.602644	9.84381	0.849727		rna2651	-9.19981	9.84381	0.0562161
STRG.703.1	-4.46598	8.37105	0.225922		STRG.703.1	0	8.37105	1
rna2666	-0.172936	7.10151	1		rna2666	-0.723424	7.10151	1
rna2671	2.07071	6.6541	0.685338		rna2671	3.84193	6.6541	0.58267
STRG.822.1	-4.32589	7.06611	0.272256		STRG.822.1	0	7.06611	1
STRG.822.2	-0.562389	6.49503	0.930201		STRG.822.2	0	6.49503	1
STRG.822.4	-1.26429	6.02907	1		STRG.822.4	0	6.02907	1
STRG.901.1	-11.0615	10.6626	0.0251402		STRG.901.1	0	10.6626	1
STRG.933.1	-0.17674	6.40783	1		STRG.933.1	0	6.40783	1
STRG.948.1	-4.50341	6.55196	0.437466		STRG.948.1	-4.20224	6.55196	0.496767
STRG.1163.1	-6.76278	7.09915	0.162367		STRG.1163.1	0	7.09915	1
sp|O75843|AP1G2_HUMAN	1.14423	6.81796	0.779937		sp|O75843|AP1G2_HUMAN	3.64992	6.81796	0.58267
sp|P61565|ENK21_HUMAN	-3.10054	7.50679	0.427556		sp|P61565|ENK21_HUMAN	-5.88834	7.50679	0.237268
STRG.1586.1	-0.0837907	6.1782	1		STRG.1586.1	0	6.1782	1
rna6013	2.07954	6.32111	0.656827		rna6013	1.26198	6.32111	1
rna6014	1.7489	6.19917	0.840381		rna6014	1.60699	6.19917	1
STRG.1689.1	-4.23818	6.63627	0.496767		STRG.1689.1	4.62183	6.63627	0.393594
ENST00000372476.7	-3.16354	5.99854	0.72178		ENST00000372476.7	0	5.99854	1
rna7188	2.53657	8.65136	0.443745		rna7188	1.11467	8.65136	0.767565
rna7191	2.18581	6.50512	0.55082		rna7191	2.55465	6.50512	1
rna7287	2.97377	10.3591	0.371973		rna7287	2.52155	10.3591	0.447512
rna7311	-2.59699	11.6116	0.543039		rna7311	-1.44339	11.6116	0.647998
rna7312	-4.80249	11.2032	0.393594		rna7312	-0.824896	11.2032	0.793901
rna7510	-2.2992	5.99787	1		rna7510	-1.8668	5.99787	1
STRG.2180.1	1.07699	6.11064	1		STRG.2180.1	0	6.11064	1
STRG.2219.1	-5.83326	6.63304	0.237268		STRG.2219.1	0	6.63304	1
STRG.2229.1	-5.2582	6.41755	0.309722		STRG.2229.1	0	6.41755	1
STRG.2361.1	-4.5286	6.21566	0.437466		STRG.2361.1	0	6.21566	1
STRG.2492.1	-3.64024	6.54477	0.58267		STRG.2492.1	-4.62103	6.54477	0.393594
STRG.2510.1	1.37201	6.2025	0.733968		STRG.2510.1	0	6.2025	1
STRG.2510.2	1.12985	6.10003	1		STRG.2510.2	0	6.10003	1
rna9058	-4.73854	6.62658	0.393594		rna9058	-4.33301	6.62658	0.437466
rna9827	0.784159	7.86481	0.816177		rna9827	0.0112821	7.86481	1
rna10630	1.98225	7.9402	0.557069		rna10630	5.42603	7.9402	0.290777
rna10888	-3.86358	6.5101	0.58267		rna10888	-4.4141	6.5101	0.437466
sp|Q86WU2|LDHD_HUMAN	-4.30734	8.19976	0.26782		sp|Q86WU2|LDHD_HUMAN	-3.04544	8.19976	0.379149
STRG.3132.1	-4.50651	6.58127	0.437466		STRG.3132.1	4.25748	6.58127	0.496767
rna11442	-3.39656	6.24379	0.72178		rna11442	-3.3888	6.24379	0.72178
rna11552	-2.45346	6.18479	1		rna11552	-3.47524	6.18479	0.72178
STRG.3216.1	-2.58457	6.45215	0.512387		STRG.3216.1	0	6.45215	1
rna12060	-7.46245	8.07644	0.12067		rna12060	-6.17028	8.07644	0.210781
ENST00000514279.5	-4.33342	6.40383	0.437466		ENST00000514279.5	-3.59174	6.40383	0.58267
rna13043	-0.634773	6.57374	0.930201		rna13043	-0.274359	6.57374	1
rna13726	0.365594	6.61564	1		rna13726	1.08549	6.61564	1
rna13848	-0.41911	6.93985	0.955361		rna13848	0.353147	6.93985	1
rna14360	-5.06393	6.3565	0.33224		rna14360	0	6.3565	1
rna14482	-4.74998	6.26926	0.393594		rna14482	0	6.26926	1
STRG.4011.2	-1.15466	6.08791	1		STRG.4011.2	0	6.08791	1
ENST00000275428.8	-5.3429	6.44592	0.290777		ENST00000275428.8	0	6.44592	1
STRG.4053.1	-4.47892	6.20449	0.437466		STRG.4053.1	0	6.20449	1
rna15506	1.32361	6.31465	0.80444		rna15506	0	6.31465	1
rna15597	-2.71838	7.02777	0.518235		rna15597	-4.75534	7.02777	0.393594
STRG.4324.1	-4.32276	8.27173	0.437466		STRG.4324.1	7.63503	8.27173	0.111065
STRG.4358.4	-2.28549	6.0314	1		STRG.4358.4	-2.32833	6.0314	1
STRG.4361.1	0.136066	6.85453	1		STRG.4361.1	4.39183	6.85453	0.437466
STRG.4391.1	-4.35362	6.66989	0.437466		STRG.4391.1	4.67575	6.66989	0.393594
rna16200	-0.896606	6.75764	0.847079		rna16200	-2.7566	6.75764	1
STRG.4417.1	-0.161179	6.03289	1		STRG.4417.1	0	6.03289	1
STRG.4417.2	-0.277611	6.15066	1		STRG.4417.2	0	6.15066	1
rna16434	0.949875	8.03815	0.779436		rna16434	-0.0154576	8.03815	1
rna16440	-1.38254	7.34084	0.698607		rna16440	0.589583	7.34084	0.914066
rna16441	-1.15228	7.22182	0.767565		rna16441	0.956996	7.22182	1
STRG.4615.1	3.01533	7.38384	0.403618		STRG.4615.1	0	7.38384	1
STRG.4721.1	3.73075	6.57242	0.429164		STRG.4721.1	0	6.57242	1
ENST00000368251.1	0.141348	6.43684	1		ENST00000368251.1	0	6.43684	1
STRG.4860.1	-3.62715	6.33189	0.58267		STRG.4860.1	-3.75152	6.33189	0.58267
rna18156	0.294194	6.53793	1		rna18156	-1.03658	6.53793	1
rna18157	-0.161105	6.0605	1		rna18157	1.55533	6.0605	1
rna18159	0.65404	6.06059	1		rna18159	1.2257	6.06059	1
rna18158	-0.222121	5.9668	1		rna18158	0	5.9668	1
rna18163	-2.57651	7.09787	0.597781		rna18163	-2.3049	7.09787	0.571191
rna18164	1.4511	6.5301	0.733968		rna18164	-0.423045	6.5301	1
STRG.4983.1	0.732814	6.45204	0.930201		STRG.4983.1	0	6.45204	1
STRG.4984.1	-1.38804	6.25563	0.733968		STRG.4984.1	0	6.25563	1
STRG.4992.1	-4.21125	6.81266	0.496767		STRG.4992.1	5.15126	6.81266	0.33224
rna18538	-3.04016	6.04641	0.72178		rna18538	-1.78225	6.04641	1
rna18842	-4.57384	6.79423	0.393594		rna18842	-5.0251	6.79423	0.33224
STRG.5225.1	-0.749409	6.22874	1		STRG.5225.1	3.27556	6.22874	0.72178
STRG.5251.1	-0.494158	6.20636	1		STRG.5251.1	0	6.20636	1
STRG.5376.4	-2.32168	6.28754	0.597781		STRG.5376.4	0	6.28754	1
sp|Q5XIF6|TBA4A_RAT	-6.54344	7.04651	0.17996		sp|Q5XIF6|TBA4A_RAT	-2.68976	7.04651	1
STRG.5489.3	-2.85847	6.04428	1		STRG.5489.3	-1.99177	6.04428	1
STRG.5496.1	-3.59047	6.55296	0.58267		STRG.5496.1	4.59391	6.55296	0.393594
STRG.5496.2	-4.19642	6.14637	0.496767		STRG.5496.2	0	6.14637	1
rna20386	-4.12566	6.36397	0.496767		rna20386	-3.56066	6.36397	0.58267
rna20391	-3.9201	6.24715	0.58267		rna20391	-2.93387	6.24715	0.72178
STRG.5546.1	-4.85789	6.47301	0.359563		STRG.5546.1	3.25621	6.47301	0.72178
STRG.5549.1	-3.83638	6.47214	0.58267		STRG.5549.1	4.20698	6.47214	0.496767
rna20681	0.376925	6.31031	1		rna20681	0	6.31031	1
rna21112	-1.11197	11.6895	0.742637		rna21112	-1.3712	11.6895	0.664224
STRG.5743.1	-0.028814	6.10194	1		STRG.5743.1	0	6.10194	1
rna21145	-0.309438	6.14958	1		rna21145	0	6.14958	1
STRG.5916.1	0.612983	6.1996	1		STRG.5916.1	0	6.1996	1
STRG.5946.1	-0.0604147	6.32675	1		STRG.5946.1	0	6.32675	1
STRG.6053.1	2.87285	7.14065	0.416842		STRG.6053.1	0	7.14065	1
rna22649	-0.801767	8.08093	0.811129		rna22649	-0.933402	8.08093	0.818774
rna22650	1.85639	6.98776	0.609513		rna22650	0	6.98776	1
STRG.6191.1	-5.85966	6.7719	0.237268		STRG.6191.1	3.12082	6.7719	0.72178
sp|Q5EBI0|S2610_MOUSE	-1.29284	7.62554	0.726702		sp|Q5EBI0|S2610_MOUSE	-1.05058	7.62554	0.822605
STRG.6644.1	-4.04474	11.5111	0.496767		STRG.6644.1	11.2199	11.5111	0.023367
rna25538	-0.9434	7.09343	0.774322		rna25538	-1.59952	7.09343	0.656827
STRG.7090.2	-1.39914	6.41917	0.738665		STRG.7090.2	1.99422	6.41917	1
STRG.7175.1	-0.206787	6.52232	1		STRG.7175.1	-3.76037	6.52232	0.58267
STRG.7307.1	-6.94428	7.20728	0.148636		STRG.7307.1	0	7.20728	1
STRG.7360.2	-3.58773	6.04861	0.58267		STRG.7360.2	0	6.04861	1
STRG.7397.1	-0.351621	6.28075	1		STRG.7397.1	0	6.28075	1
STRG.7483.1	1.10568	6.8865	0.779937		STRG.7483.1	-4.10083	6.8865	0.496767
sp|O95985|TOP3B_HUMAN	-4.403	6.30716	0.437466		sp|O95985|TOP3B_HUMAN	-2.71596	6.30716	1
STRG.7507.1	-4.35546	7.66645	0.252265		STRG.7507.1	3.50635	7.66645	0.58267
id334128	-4.62734	6.23882	0.393594		id334128	0	6.23882	1
STRG.7511.1	-4.80942	6.98561	0.393594		STRG.7511.1	5.38064	6.98561	0.290777
STRG.7516.1	-5.1098	6.89434	0.33224		STRG.7516.1	4.96925	6.89434	0.359563
rna27815	0.187965	7.71862	0.974066		rna27815	-0.228561	7.71862	1
rna27816	1.46006	8.17856	0.676203		rna27816	1.17315	8.17856	0.744393
sp|Q13615|MTMR3_HUMAN	0.0161272	6.9904	1		sp|Q13615|MTMR3_HUMAN	-1.97485	6.9904	0.656827
STRG.7571.1	-3.7583	6.30987	0.58267		STRG.7571.1	-3.54466	6.30987	0.58267
STRG.7602.1	-5.95351	6.68448	0.227512		STRG.7602.1	0	6.68448	1
rna28467	1.32768	6.82893	0.70968		rna28467	3.24458	6.82893	0.72178
rna28468	1.64427	7.4028	0.642029		rna28468	2.38203	7.4028	0.597781
Chromate_transp	-0.32299	6.89449	0.930201		Chromate_transp	0.223765	6.89449	1
STRG.7896.2	-0.699176	6.07291	1		STRG.7896.2	0	6.07291	1
STRG.8000.1	-3.64102	6.14203	0.58267		STRG.8000.1	-2.2037	6.14203	1
STRG.8055.1	-4.30764	6.41402	0.496767		STRG.8055.1	-3.67935	6.41402	0.58267
rna29747	0.0807367	6.32056	1		rna29747	0	6.32056	1
STRG.8100.1	-5.66123	6.56255	0.260517		STRG.8100.1	0	6.56255	1
STRG.8102.1	-4.35749	8.39939	0.222812		STRG.8102.1	0	8.39939	1
rna30018	0.100137	6.3613	1		rna30018	2.73897	6.3613	1
rna30205	1.23464	7.04994	0.741126		rna30205	0.976333	7.04994	0.845318
rna30204	0.920104	6.92744	0.872036		rna30204	0.138656	6.92744	1
rna30203	2.62958	6.74826	0.452835		rna30203	-1.21597	6.74826	1
STRG.8162.2	-2.53268	6.01926	1		STRG.8162.2	-1.9746	6.01926	1
rna30317	-4.31283	6.3393	0.437466		rna30317	-3.16788	6.3393	0.72178
rna30622	-0.368375	11.0229	0.90666		rna30622	-0.283736	11.0229	0.930807
rna30623	-0.393158	7.86896	0.912766		rna30623	-1.05643	7.86896	0.78873
rna30838	2.22351	9.74134	0.523132		rna30838	-0.216247	9.74134	0.945008
rna30884	-3.20056	6.14539	0.72178		rna30884	-2.79644	6.14539	1
rna30980	-0.625844	5.93379	1		rna30980	0	5.93379	1
STRG.8522.1	1.50775	6.25748	0.733968		STRG.8522.1	0	6.25748	1
rna32021	2.18311	7.7596	0.525287		rna32021	5.49112	7.7596	0.274571
STRG.8701.1	-4.56704	6.53322	0.437466		STRG.8701.1	3.99342	6.53322	0.496767
rna32515	-1.06064	6.56339	0.888251		rna32515	-2.37985	6.56339	0.496767
rna32859	-2.77559	6.01893	1		rna32859	-1.68464	6.01893	1
rna32912	1.73096	6.58228	0.700387		rna32912	0	6.58228	1
rna32913	1.14975	8.02027	0.735458		rna32913	0.371958	8.02027	0.949264
STRG.8921.1	-4.29659	6.84183	0.496767		STRG.8921.1	-5.26524	6.84183	0.309722
STRG.8980.2	-2.7892	6.07987	1		STRG.8980.2	-2.50373	6.07987	1
STRG.9009.1	-2.93031	6.26107	0.72178		STRG.9009.1	3.63597	6.26107	0.58267
sp|P54265|DMPK_MOUSE	0.852043	7.39972	0.817108		sp|P54265|DMPK_MOUSE	4.55572	7.39972	0.437466
rna33387	1.66177	7.13491	0.646868		rna33387	0.912254	7.13491	1
rna33559	-0.594001	6.88674	0.865599		rna33559	-3.4138	6.88674	0.72178
rna33558	-0.777178	7.13561	0.830541		rna33558	-4.74238	7.13561	0.393594
STRG.9120.1	-2.41073	6.52413	0.571191		STRG.9120.1	0	6.52413	1
STRG.9245.2	-2.18975	5.99679	1		STRG.9245.2	-1.94212	5.99679	1
rna34186	0.379051	6.74162	0.955361		rna34186	0	6.74162	1
STRG.9282.2	-2.82527	7.23109	1		STRG.9282.2	6.20981	7.23109	0.203538
rna34499	1.5419	6.44601	0.738665		rna34499	2.34802	6.44601	1
rna35212	-2.7771	6.14445	1		rna35212	-3.07275	6.14445	0.72178
rna35930	1.64522	7.35305	0.653465		rna35930	4.16259	7.35305	0.496767
STRG.9782.1	0.16713	6.34032	1		STRG.9782.1	0	6.34032	1
rna36002	-4.95756	7.30744	0.196908		rna36002	-5.24732	7.30744	0.309722
rna36154	-0.78008	6.57153	0.930201		rna36154	-0.853369	6.57153	1
rna36257	0.69225	7.28168	0.862149		rna36257	0.746571	7.28168	0.888251
STRG.9901.1	-0.550699	6.20121	1		STRG.9901.1	0	6.20121	1
rna36410	-5.8502	6.81501	0.237268		rna36410	-3.61735	6.81501	0.58267
rna36482	-2.97477	6.08285	0.72178		rna36482	-2.35305	6.08285	1
STRG.10149.2	-4.38753	6.18459	0.437466		STRG.10149.2	0	6.18459	1
rna37606	-3.94747	6.10214	0.58267		rna37606	0	6.10214	1
sp|Q78P75|DYL2_RAT	-4.20321	6.30204	0.496767		sp|Q78P75|DYL2_RAT	-3.01035	6.30204	0.72178
rna38324	0.686004	7.9173	0.857464		rna38324	0.0884148	7.9173	1
STRG.10465.1	-4.07829	6.33281	0.496767		STRG.10465.1	3.33499	6.33281	0.72178
rna38424	-0.497678	6.11799	1		rna38424	-2.98611	6.11799	0.72178
STRG.10498.1	-4.65553	6.24563	0.393594		STRG.10498.1	0	6.24563	1
STRG.10572.1	-5.7059	7.04235	0.260517		STRG.10572.1	4.96482	7.04235	0.359563
STRG.10675.1	0.0944849	6.10606	1		STRG.10675.1	0	6.10606	1
sp|P11230|ACHB_HUMAN	2.22965	6.3515	0.656827		sp|P11230|ACHB_HUMAN	-2.48024	6.3515	1
ENST00000571877.1	-3.69914	6.39045	0.58267		ENST00000571877.1	-0.74808	6.39045	1
ENST00000315684.12	-0.892178	6.04431	1		ENST00000315684.12	0	6.04431	1
STRG.10809.1	-0.987125	6.39591	0.845318		STRG.10809.1	0	6.39591	1
STRG.10828.1	-4.22905	6.32211	0.496767		STRG.10828.1	3.08078	6.32211	0.72178
rna39606	-0.714399	6.55353	0.872036		rna39606	0	6.55353	1
STRG.10921.1	2.38715	6.9556	0.489044		STRG.10921.1	0	6.9556	1
rna40160	0.0342523	8.20846	1		rna40160	-0.326577	8.20846	0.960151
STRG.11002.1	-6.77452	7.10497	0.162367		STRG.11002.1	0	7.10497	1
ENST00000421952.2	-6.00355	6.8751	0.227512		ENST00000421952.2	-3.61222	6.8751	0.58267
rna40796	0.597274	7.81211	0.867011		rna40796	1.42593	7.81211	0.742637
rna40798	-0.160205	6.87512	1		rna40798	-0.951433	6.87512	0.840381
rna40800	-0.116513	7.07462	1		rna40800	-1.20082	7.07462	0.840381
rna40797	-0.237752	5.95352	1		rna40797	0	5.95352	1
rna41062	-5.31681	6.78514	0.309722		rna41062	-4.43677	6.78514	0.437466
rna41090	-1.08464	8.39712	0.747027		rna41090	-2.49622	8.39712	0.49692
rna41091	-2.24696	10.6272	0.487432		rna41091	-3.38053	10.6272	0.330555
ENST00000625158.1	0.78094	11.6627	0.806528		ENST00000625158.1	0.833801	11.6627	0.789723
STRG.11364.1	-3.96036	6.38359	0.58267		STRG.11364.1	-3.80332	6.38359	0.58267
rna41570	-9.18527	11.2901	0.0377889		rna41570	-9.14261	11.2901	0.0577432
STRG.11411.1	2.89865	6.38557	0.55082		STRG.11411.1	0	6.38557	1
STRG.11519.1	-4.34652	11.2314	0.437466		STRG.11519.1	-10.9337	11.2314	0.0264763
rna42295	-1.15233	6.00609	1		rna42295	0	6.00609	1
STRG.11586.1	-2.53422	6.89137	0.50449		STRG.11586.1	0	6.89137	1
ENST00000566415.1	-3.19782	6.09172	0.72178		ENST00000566415.1	-2.20736	6.09172	1
STRG.11921.1	-4.11705	6.7377	0.496767		STRG.11921.1	-5.04227	6.7377	0.33224
STRG.11922.1	-3.48279	6.30139	0.72178		STRG.11922.1	-3.67654	6.30139	0.58267
rna43387	-5.87171	7.17607	0.237268		rna43387	-5.29687	7.17607	0.309722
rna43793	-4.23059	6.35203	0.496767		rna43793	-3.36989	6.35203	0.72178
STRG.12160.1	1.47735	6.27645	0.80444		STRG.12160.1	0	6.27645	1
ENST00000609261.5	0.144332	7.92645	0.982582		ENST00000609261.5	-0.0505848	7.92645	1
sp|Q9UNE7|CHIP_HUMAN	-6.8479	7.149	0.155108		sp|Q9UNE7|CHIP_HUMAN	0	7.149	1
STRG.12302.1	-3.91977	6.09749	0.58267		STRG.12302.1	0	6.09749	1
rna44934	0.413984	6.31814	1		rna44934	0.382472	6.31814	1
STRG.12562.1	-0.24225	6.24623	1		STRG.12562.1	0	6.24623	1
STRG.12723.1	-4.74799	6.40591	0.393594		STRG.12723.1	2.90502	6.40591	0.72178
rna46739	-3.64855	6.23746	0.58267		rna46739	-3.154	6.23746	0.72178
rna46740	-3.32362	6.29989	0.72178		rna46740	-3.75196	6.29989	0.58267
rna46968	2.03065	7.87957	0.592842		rna46968	0.444351	7.87957	0.931296
STRG.12924.4	-4.11248	6.81874	0.333906		STRG.12924.4	0	6.81874	1
STRG.13003.1	-2.41566	6.50963	1		STRG.13003.1	-4.76599	6.50963	0.393594
rna47588	-1.17988	6.97106	0.779937		rna47588	-4.66443	6.97106	0.393594
sp|O19048|PCBP1_RABIT	-0.318853	11.1711	0.919564		sp|O19048|PCBP1_RABIT	-0.820832	11.1711	0.799697
rna48361	-1.03462	7.49507	0.744948		rna48361	-0.884729	7.49507	0.872036
STRG.13311.1	-3.74504	6.3116	0.58267		STRG.13311.1	3.49007	6.3116	0.58267
STRG.13370.2	-4.88062	6.30383	0.359563		STRG.13370.2	0	6.30383	1
rna49607	1.30359	6.32081	0.80444		rna49607	0	6.32081	1
STRG.13853.1	-4.61722	6.5148	0.393594		STRG.13853.1	3.85197	6.5148	0.58267
rna50659	-2.12579	7.92496	0.526923		rna50659	-1.00657	7.92496	0.80444
rna50660	-0.419713	7.15916	0.949264		rna50660	-1.53393	7.15916	0.738665
rna52001	-3.00742	7.70143	0.374293		rna52001	-2.57389	7.70143	0.452835
STRG.14209.1	-3.41484	6.26707	0.72178		STRG.14209.1	-3.52293	6.26707	0.58267
rna52254	-5.06026	6.63019	0.33224		rna52254	-4.00673	6.63019	0.496767
STRG.14381.1	1.10591	6.58854	0.822605		STRG.14381.1	-1.78116	6.58854	1
STRG.14504.1	-3.02071	6.25225	0.72178		STRG.14504.1	-3.63554	6.25225	0.58267
STRG.14564.1	3.48708	7.71622	0.327591		STRG.14564.1	0	7.71622	1
STRG.14633.1	-2.03693	6.68054	0.606464		STRG.14633.1	0	6.68054	1
STRG.14635.1	-0.571673	6.22844	1		STRG.14635.1	0	6.22844	1
STRG.14745.1	3.58024	7.6224	0.301737		STRG.14745.1	0	7.6224	1
STRG.14804.1	-2.06624	6.29513	0.597781		STRG.14804.1	0	6.29513	1
STRG.14968.1	-2.66946	7.50913	1		STRG.14968.1	-6.70609	7.50913	0.166341
STRG.14998.1	-5.55867	6.52316	0.274571		STRG.14998.1	0	6.52316	1
STRG.15000.1	-2.01538	6.70335	0.606464		STRG.15000.1	0	6.70335	1
STRG.15002.1	-6.04925	6.72785	0.218732		STRG.15002.1	0	6.72785	1
rna55522	1.40969	7.63378	0.68376		rna55522	1.05837	7.63378	0.845318
rna55575	-3.79438	6.16729	0.58267		rna55575	-2.28363	6.16729	1
rna55574	-2.71002	6.09905	1		rna55574	-2.748	6.09905	1
rna55589	-2.80828	7.81565	0.45856		rna55589	-6.6409	7.81565	0.170577
rna55748	0.293933	7.38205	0.960151		rna55748	-0.0323998	7.38205	1
rna55747	-1.93654	6.49708	0.733968		rna55747	-0.900942	6.49708	1
STRG.15127.1	0.108381	7.09592	1		STRG.15127.1	0	7.09592	1
STRG.15169.1	-2.77433	6.85048	0.427556		STRG.15169.1	0	6.85048	1
sp|Q5RKI1|IF4A2_RAT	-0.153564	7.97624	0.984731		sp|Q5RKI1|IF4A2_RAT	0.101405	7.97624	1
STRG.15327.1	-1.17178	6.32899	0.80444		STRG.15327.1	0	6.32899	1
STRG.15348.1	-2.85459	6.2417	1		STRG.15348.1	-3.64934	6.2417	0.58267
STRG.15398.1	1.4768	6.76124	0.665031		STRG.15398.1	3.17693	6.76124	0.72178
STRG.15398.2	-2.69143	6.11966	1		STRG.15398.2	2.8357	6.11966	0.72178
STRG.15493.2	-3.64835	6.10719	0.58267		STRG.15493.2	1.54161	6.10719	1
rna57244	-2.32946	6.0361	1		rna57244	-2.35421	6.0361	1
rna58537	1.17288	10.8122	0.711889		rna58537	0.686756	10.8122	0.831115
sp|P15540|CP21A_PIG	-4.17388	6.14189	0.496767		sp|P15540|CP21A_PIG	0	6.14189	1
Cadherin_2	-6.84118	8.02179	0.15863		Cadherin_2	-1.46449	8.02179	0.659528
rna58984	-0.803408	6.74934	0.914066		rna58984	-0.865064	6.74934	0.888251
rna58985	-1.7515	6.25814	0.656827		rna58985	0	6.25814	1
rna58986	1.01341	6.33979	0.840381		rna58986	0.153944	6.33979	1
EII-Sor	-0.374363	7.32374	0.911538		EII-Sor	0	7.32374	1
STRG.16357.1	-2.51698	6.1654	1		STRG.16357.1	3.25742	6.1654	0.72178
rna60493	-0.0530318	6.60516	1		rna60493	-2.42759	6.60516	1
rna60497	-2.05913	7.11345	0.581853		rna60497	-1.28689	7.11345	0.80444
rna60496	0.100594	7.1798	1		rna60496	-1.56985	7.1798	0.738665
rna60891	-4.56203	6.29398	0.437466		rna60891	-2.10019	6.29398	1
rna61086	1.77021	11.6513	0.577644		rna61086	1.3422	11.6513	0.673374
STRG.16824.1	-2.54227	6.20689	1		STRG.16824.1	-3.56651	6.20689	0.58267
rna62446	1.34518	11.3133	0.671353		rna62446	0.705886	11.3133	0.822974
STRG.17063.1	-2.67905	7.23888	0.47477		STRG.17063.1	-4.5086	7.23888	0.437466
rna63313	-0.631977	7.52967	0.845318		rna63313	2.09141	7.52967	0.570138
rna63316	2.04231	7.28625	0.562794		rna63316	1.3099	7.28625	0.840381
rna63318	-0.0978071	6.75296	1		rna63318	2.84523	6.75296	0.512387
rna63317	-0.138536	6.55028	1		rna63317	4.34552	6.55028	0.437466
rna63440	-2.55513	6.0204	1		rna63440	1.91282	6.0204	1
STRG.17285.1	-0.89567	6.84776	0.798998		STRG.17285.1	0	6.84776	1
rna63956	-2.21817	6.52967	0.58267		rna63956	-4.45598	6.52967	0.437466
STRG.17312.2	-0.264312	6.09945	1		STRG.17312.2	0	6.09945	1
STRG.17357.1	-7.60108	7.6425	0.112528		STRG.17357.1	0	7.6425	1
STRG.17370.1	-1.75954	6.4222	0.685338		STRG.17370.1	0	6.4222	1
STRG.17371.1	-4.65814	6.24627	0.393594		STRG.17371.1	0	6.24627	1
ENST00000620041.4	0.844306	6.40244	0.845318		ENST00000620041.4	0	6.40244	1
rna64280	2.58537	7.55648	0.448296		rna64280	-3.74584	7.55648	0.58267
STRG.17431.1	-1.94593	6.09958	1		STRG.17431.1	-3.0796	6.09958	0.72178
rna64404	-0.452894	6.75233	1		rna64404	-0.0804864	6.75233	1
rna65125	-3.41867	6.08229	0.72178		rna65125	-1.72287	6.08229	1
STRG.17672.3	-5.18019	6.39222	0.309722		STRG.17672.3	0	6.39222	1
STRG.17686.1	-2.77531	6.06857	1		STRG.17686.1	2.32079	6.06857	1
STRG.17727.1	-1.15486	6.3557	0.80444		STRG.17727.1	0	6.3557	1
STRG.17808.1	0.0499266	6.26231	1		STRG.17808.1	0	6.26231	1
id809300	-6.31485	7.37658	0.196908		id809300	-5.47325	7.37658	0.274571
id809370	-4.13492	6.36135	0.496767		id809370	-3.53327	6.36135	0.58267
STRG.17968.1	-4.76709	6.43648	0.393594		STRG.17968.1	3.13493	6.43648	0.72178
STRG.17978.3	0.31301	6.11585	1		STRG.17978.3	0	6.11585	1
STRG.18206.1	-4.22662	6.29487	0.496767		STRG.18206.1	2.82933	6.29487	0.72178
ENST00000423007.5	-3.12404	6.03607	0.72178		ENST00000423007.5	1.31812	6.03607	1
rna67679	-4.73652	6.26583	0.393594		rna67679	0	6.26583	1
STRG.18296.1	-5.23918	6.52	0.309722		STRG.18296.1	-2.77287	6.52	1
sp|P59083|PHP14_PIG	0.80566	7.73417	0.837829		sp|P59083|PHP14_PIG	-0.296734	7.73417	1
sp|Q8MIP0|FRIH_HORSE	0.448906	8.33149	0.893137		sp|Q8MIP0|FRIH_HORSE	-0.338544	8.33149	1
STRG.18400.1	-2.77436	6.51764	1		STRG.18400.1	-4.73748	6.51764	0.393594
STRG.18421.1	0.0488435	6.29244	1		STRG.18421.1	0	6.29244	1
rna68270	-4.39117	6.61552	0.437466		rna68270	-4.53456	6.61552	0.437466
STRG.18500.1	-1.0829	6.78561	0.743657		STRG.18500.1	0	6.78561	1
rna68627	-5.27415	6.60115	0.309722		rna68627	-3.44823	6.60115	0.72178
rna68626	-4.29098	6.29653	0.496767		rna68626	-2.82445	6.29653	1
rna68625	-3.40944	6.16179	0.72178		rna68625	-2.75397	6.16179	1
rna68624	-3.25036	6.14294	0.72178		rna68624	-2.73282	6.14294	1
rna68872	-4.63793	6.24136	0.393594		rna68872	0	6.24136	1
STRG.18624.1	-9.81396	9.5045	0.0431806		STRG.18624.1	3.28083	9.5045	0.72178
ENST00000540040.2	4.02257	18.9695	0.239334		ENST00000540040.2	1.08956	18.9695	0.727651
STRG.18627.1	-4.92672	6.51	0.359563		STRG.18627.1	-3.47199	6.51	0.72178
STRG.18673.3	0.323836	6.01936	1		STRG.18673.3	0	6.01936	1
rna69770	-12.4748	18.03	0.00658363		rna69770	-12.2215	18.03	0.00763534
rna70264	-0.205458	6.07914	1		rna70264	1.40856	6.07914	1
rna70363	1.19973	11.4677	0.845318		rna70363	-1.25704	11.4677	0.689932
STRG.19008.1	-3.5725	7.75218	0.58267		STRG.19008.1	-7.00832	7.75218	0.145653
Ytca	-1.71693	6.52777	0.738665		Ytca	-3.19353	6.52777	0.72178
rna71239	-3.25798	6.0084	0.72178		rna71239	0	6.0084	1
STRG.19238.1	-0.881113	6.22272	0.888251		STRG.19238.1	0	6.22272	1
STRG.19375.1	-4.07763	6.32126	0.496767		STRG.19375.1	3.25819	6.32126	0.72178
STRG.19399.1	-5.45036	6.70652	0.290777		STRG.19399.1	3.75077	6.70652	0.58267
STRG.19399.2	-3.51904	6.03961	0.58267		STRG.19399.2	0	6.03961	1
STRG.19434.1	-3.97704	6.3005	0.496767		STRG.19434.1	3.21795	6.3005	0.72178
ENST00000340535.11	-0.741563	6.79378	0.914066		ENST00000340535.11	-0.221027	6.79378	1
STRG.19535.1	-3.78309	7.19066	0.58267		STRG.19535.1	-6.11035	7.19066	0.210781
STRG.19583.1	0.0224364	6.27529	1		STRG.19583.1	0	6.27529	1
STRG.19639.1	-4.36098	6.69584	0.437466		STRG.19639.1	4.76067	6.69584	0.393594
STRG.19647.1	0.614538	6.37366	1		STRG.19647.1	3.15107	6.37366	0.72178
STRG.19669.1	-6.81485	7.16667	0.15863		STRG.19669.1	2.07817	7.16667	1
rna73367	-1.57396	7.41795	0.642029		rna73367	0.133378	7.41795	1
STRG.19760.1	0.676685	6.40324	1		STRG.19760.1	-2.43723	6.40324	1
STRG.20091.1	-4.73842	6.26631	0.393594		STRG.20091.1	0	6.26631	1
STRG.20102.1	2.03416	6.20392	0.733968		STRG.20102.1	0	6.20392	1
MerC	2.59396	8.74264	0.436453		MerC	-1.05516	8.74264	0.78274
STRG.20267.1	-3.47292	6.56428	0.72178		STRG.20267.1	-4.72992	6.56428	0.393594
STRG.20348.2	-2.72919	6.04624	1		STRG.20348.2	-2.15952	6.04624	1
rna75693	4.44641	8.28789	0.214435		rna75693	4.37314	8.28789	0.345956
STRG.20450.1	-4.6644	7.27076	0.393594		STRG.20450.1	-6.10485	7.27076	0.218732
rna75951	-6.64192	7.29723	0.170577		rna75951	-4.58501	7.29723	0.393594
rna75950	-6.06602	6.86043	0.218732		rna75950	-3.24112	6.86043	0.72178
rna76499	-1.24682	8.13961	0.714108		rna76499	-1.35394	8.13961	0.743657
rna76501	-1.36039	6.17805	1		rna76501	-2.83231	6.17805	1
rna76502	4.22893	10.2225	0.22566		rna76502	4.66574	10.2225	0.189716
STRG.20629.2	-3.63548	6.1251	0.58267		STRG.20629.2	-1.98817	6.1251	1
rna76513	-6.61064	7.69973	0.175106		rna76513	1.91785	7.69973	0.581853
rna76512	-3.62049	8.27108	0.33506		rna76512	-0.15762	8.27108	0.978559
rna76514	-3.3026	8.06726	0.342804		rna76514	0.564426	8.06726	0.892245
rna76560	0.880656	6.68575	0.888251		rna76560	2.21013	6.68575	0.656827
rna76562	-0.711453	6.0482	1		rna76562	1.58174	6.0482	1
STRG.20655.1	-6.3275	7.02796	0.196908		STRG.20655.1	-3.73489	7.02796	0.58267
STRG.20657.1	-1.90627	6.20287	0.733968		STRG.20657.1	0	6.20287	1
STRG.20660.1	-5.26046	6.4183	0.309722		STRG.20660.1	0	6.4183	1
STRG.20668.1	-5.40966	6.4691	0.290777		STRG.20668.1	0	6.4691	1
STRG.20669.1	-5.29108	6.42834	0.309722		STRG.20669.1	0	6.42834	1
STRG.20670.1	-5.40139	6.46619	0.290777		STRG.20670.1	0	6.46619	1
STRG.20673.1	-2.12644	6.40957	0.55082		STRG.20673.1	0	6.40957	1
STRG.20675.1	-6.03715	6.88589	0.218732		STRG.20675.1	-3.58964	6.88589	0.58267
STRG.20676.1	-8.47163	8.38396	0.0772369		STRG.20676.1	-3.90659	8.38396	0.58267
STRG.20677.1	-5.6344	6.55231	0.260517		STRG.20677.1	0	6.55231	1
STRG.20680.1	-7.00734	7.51528	0.145653		STRG.20680.1	-4.79997	7.51528	0.393594
rna76687	1.7391	6.96126	0.633988		rna76687	4.35157	6.96126	0.437466
rna76688	2.32336	7.24013	0.489044		rna76688	2.65551	7.24013	0.656827
STRG.20693.1	-4.10203	6.40853	0.496767		STRG.20693.1	-3.82725	6.40853	0.58267
STRG.20695.1	-6.14972	7.41366	0.210781		STRG.20695.1	-5.74481	7.41366	0.248189
STRG.20696.1	-4.06779	6.5985	0.496767		STRG.20696.1	-4.63894	6.5985	0.393594
rna76695	0.717727	6.19417	1		rna76695	2.51986	6.19417	1
STRG.20699.2	-4.05247	6.78108	0.496767		STRG.20699.2	-5.18372	6.78108	0.309722
STRG.20699.3	-3.8221	6.39567	0.58267		STRG.20699.3	-3.95457	6.39567	0.58267
rna76696	1.22434	6.50425	0.80444		rna76696	3.44478	6.50425	0.72178
STRG.20705.1	-5.47512	7.57883	0.290777		STRG.20705.1	-6.45913	7.57883	0.185179
STRG.20707.1	-6.00582	6.87034	0.227512		STRG.20707.1	-3.56555	6.87034	0.58267
STRG.20709.1	-11.0669	10.6886	0.0250795		STRG.20709.1	-4.37585	10.6886	0.437466
STRG.20724.1	-3.92087	6.33239	0.58267		STRG.20724.1	-3.54501	6.33239	0.58267
STRG.20727.1	-5.90175	6.66219	0.237268		STRG.20727.1	0	6.66219	1
STRG.20731.1	-4.78364	6.82234	0.393594		STRG.20731.1	4.93909	6.82234	0.359563
STRG.20732.1	-1.51067	6.74598	0.80444		STRG.20732.1	-4.71835	6.74598	0.393594
STRG.20736.1	-6.00987	6.7096	0.227512		STRG.20736.1	0	6.7096	1
rna76821	-4.74613	6.26828	0.393594		rna76821	0	6.26828	1
rna76823	-5.26927	6.62774	0.309722		rna76823	-3.64935	6.62774	0.58267
rna76842	-0.47477	8.35258	0.888931		rna76842	-1.26892	8.35258	0.698607
rna76843	-0.466654	6.90984	0.924286		rna76843	-2.02161	6.90984	1
rna76883	1.0949	9.27117	0.732897		rna76883	0.798597	9.27117	0.810694
STRG.20778.1	-5.64133	6.9098	0.260517		STRG.20778.1	-4.57534	6.9098	0.393594
STRG.20779.1	-1.42592	7.19476	0.692765		STRG.20779.1	0	7.19476	1
rna76903	-5.43481	6.88288	0.290777		rna76903	-4.70985	6.88288	0.393594
STRG.20780.1	-5.89271	7.15782	0.237268		STRG.20780.1	-1.72727	7.15782	0.685338
STRG.20784.1	0.0540855	6.15395	1		STRG.20784.1	0	6.15395	1
STRG.20784.2	-1.75401	6.24226	0.656827		STRG.20784.2	0	6.24226	1
rna76913	-0.915123	6.68654	0.78873		rna76913	3.54611	6.68654	0.58267
rna76912	0.153486	6.12791	1		rna76912	0	6.12791	1
STRG.20805.1	-3.26987	7.11459	0.351031		STRG.20805.1	0	7.11459	1
STRG.20811.1	-5.09204	6.59693	0.33224		STRG.20811.1	-3.766	6.59693	0.58267
rna77008	-1.98739	6.57274	0.685338		rna77008	-0.494398	6.57274	1
STRG.20822.1	-6.25404	10.1987	0.203538		STRG.20822.1	-9.8037	10.1987	0.043305
STRG.20825.1	-0.785809	6.45861	1		STRG.20825.1	-3.86353	6.45861	0.58267
STRG.20841.1	-6.24161	6.81875	0.203538		STRG.20841.1	0	6.81875	1
STRG.20852.1	2.84762	7.28447	0.435098		STRG.20852.1	0	7.28447	1
STRG.20865.1	-6.04613	6.79145	0.218732		STRG.20865.1	-2.39464	6.79145	1
STRG.20880.1	-5.73645	6.73033	0.248189		STRG.20880.1	3.19638	6.73033	0.72178
STRG.20886.1	-7.12677	7.42934	0.137561		STRG.20886.1	-3.55395	7.42934	0.58267
rna77163	-1.28723	7.33068	0.709202		rna77163	3.898	7.33068	0.58267
STRG.20895.1	-4.07281	7.44014	0.496767		STRG.20895.1	-6.50111	7.44014	0.17996
STRG.20896.1	-4.05896	6.52753	0.496767		STRG.20896.1	-4.38668	6.52753	0.437466
rna77198	-1.36183	8.93183	0.672077		rna77198	-1.3024	8.93183	0.690755
rna77199	-0.762375	7.80258	0.848523		rna77199	-0.64513	7.80258	0.880108
rna77208	-0.504393	7.18119	0.930201		rna77208	1.07517	7.18119	0.822605
rna77207	0.264796	6.70979	1		rna77207	0.540029	6.70979	1
STRG.20922.1	-7.50735	7.57574	0.117234		STRG.20922.1	0	7.57574	1
STRG.20925.1	-5.07953	6.92427	0.33224		STRG.20925.1	-5.1377	6.92427	0.33224
rna77251	1.5354	6.95372	0.656827		rna77251	-0.362603	6.95372	0.930201
id942908	-7.02117	8.29381	0.145653		id942908	-7.10894	8.29381	0.140126
rna77281	1.68777	9.97556	0.598274		rna77281	1.3007	9.97556	0.69347
gene32783	0.323613	8.44812	0.921885		gene32783	-0.172056	8.44812	1
rna77300	0.971049	7.30544	0.830541		rna77300	0.908552	7.30544	0.78873
STRG.20962.1	1.04406	6.27093	0.888251		STRG.20962.1	0	6.27093	1
STRG.20965.1	-3.95515	6.57603	0.58267		STRG.20965.1	-4.60982	6.57603	0.393594
STRG.20966.1	0.991505	6.15783	0.840381		STRG.20966.1	0	6.15783	1
STRG.20968.1	-4.23245	6.2855	0.496767		STRG.20968.1	2.7302	6.2855	1
STRG.20975.1	-7.29915	7.51288	0.1284		STRG.20975.1	-3.25193	7.51288	0.72178
STRG.20984.1	-3.83588	6.35339	0.58267		STRG.20984.1	-3.73097	6.35339	0.58267
STRG.20987.1	-5.44796	6.48282	0.290777		STRG.20987.1	0	6.48282	1
STRG.20990.1	-0.623632	6.17769	1		STRG.20990.1	0	6.17769	1
STRG.20992.1	-5.98308	6.69758	0.227512		STRG.20992.1	0	6.69758	1
STRG.20998.1	-4.19854	6.29191	0.496767		STRG.20998.1	2.87191	6.29191	0.72178
STRG.21016.1	-4.2086	7.6186	0.496767		STRG.21016.1	-3.0315	7.6186	0.426945
STRG.21016.2	-3.77622	6.61259	0.58267		STRG.21016.2	-4.7927	6.61259	0.393594
STRG.21016.3	-3.58277	6.17342	0.58267		STRG.21016.3	-2.65701	6.17342	1
STRG.21016.4	-3.45259	6.15858	0.72178		STRG.21016.4	-2.66195	6.15858	1
STRG.21019.1	-3.99643	6.35825	0.496767		STRG.21019.1	-3.63517	6.35825	0.58267
STRG.21022.1	-1.80079	6.87673	1		STRG.21022.1	-5.67991	6.87673	0.260517
rna77419	-0.225557	8.42572	0.952206		rna77419	-1.02093	8.42572	0.779436
STRG.21042.1	-1.00293	6.65201	0.847079		STRG.21042.1	0	6.65201	1
rna77477	-0.257735	7.90856	0.972118		rna77477	-0.407051	7.90856	0.931296
STRG.21051.1	-7.18717	7.36005	0.135113		STRG.21051.1	0	7.36005	1
STRG.21067.1	-5.18897	6.83451	0.309722		STRG.21067.1	4.70425	6.83451	0.393594
STRG.21068.1	-1.90864	6.65389	0.633988		STRG.21068.1	0	6.65389	1
STRG.21069.1	-5.50751	6.69607	0.274571		STRG.21069.1	-3.61866	6.69607	0.58267
STRG.21076.1	-6.52756	7.18466	0.17996		STRG.21076.1	-4.22741	7.18466	0.496767
rna77711	-1.97887	6.17794	1		rna77711	0.513951	6.17794	1
rna77708	0.468436	6.75757	1		rna77708	-0.379701	6.75757	1
rna76233	1.07515	9.10415	0.742134		rna76233	1.16762	9.10415	0.735458
STRG.20557.1	-6.16782	7.64564	0.210781		STRG.20557.1	-6.29281	7.64564	0.196908
STRG.20587.1	-2.52498	6.70267	0.452835		STRG.20587.1	-3.51387	6.70267	0.72178
rna76346	-0.462975	8.55894	0.897652		rna76346	0.462167	8.55894	0.903699
STRG.20604.1	-8.37663	12.846	0.0808018		STRG.20604.1	-12.5301	12.846	0.0132274
STRG.20608.1	-6.19193	12.468	0.210781		STRG.20608.1	-12.184	12.468	0.0153819
rna76450	1.59677	6.60657	0.665031		rna76450	0	6.60657	1
rna76467	-1.70191	7.67918	0.627466		rna76467	2.26464	7.67918	0.559686
STRG.20619.1	-5.86184	6.64493	0.237268		STRG.20619.1	0	6.64493	1
STRG.20643.1	-8.43389	8.3414	0.0789672		STRG.20643.1	-3.65093	8.3414	0.58267
rna76708	-0.821356	6.39955	1		rna76708	-1.82959	6.39955	0.72178
STRG.20720.1	-6.22315	6.81008	0.203538		STRG.20720.1	0	6.81008	1
STRG.20750.1	-6.03746	6.95751	0.218732		STRG.20750.1	-4.10908	6.95751	0.496767
STRG.20826.6	-2.02777	6.24488	0.656827		STRG.20826.6	0	6.24488	1
rna77364	0.162713	6.69415	1		rna77364	3.91803	6.69415	0.58267
STRG.21008.1	-4.75156	6.61337	0.393594		STRG.21008.1	-4.26348	6.61337	0.496767
STRG.21045.1	-3.68092	6.501	0.58267		STRG.21045.1	-4.45395	6.501	0.437466
STRG.21055.1	-6.43286	7.2383	0.185179		STRG.21055.1	-4.76137	7.2383	0.393594
STRG.21087.1	-5.48983	6.64481	0.274571		STRG.21087.1	-3.25628	6.64481	0.72178
STRG.21118.1	-4.20766	6.89323	0.312767		STRG.21118.1	0	6.89323	1
STRG.21127.1	3.1792	7.36855	0.35366		STRG.21127.1	0	7.36855	1
STRG.40.5	-2.23486	6.0237	1		STRG.40.5	-2.27967	6.0237	1
sp|Q96MW7|TIGD1_HUMAN	2.67986	6.54926	1		sp|Q96MW7|TIGD1_HUMAN	-0.0341842	6.54926	1
STRG.162.1	5.51006	16.3498	0.274571		STRG.162.1	-16.0911	16.3498	0.00281302
STRG.255.2	2.28416	6.01338	1		STRG.255.2	-2.08688	6.01338	1
STRG.309.1	3.25645	6.27143	0.72178		STRG.309.1	-3.61654	6.27143	0.58267
STRG.435.1	5.03179	6.56009	0.33224		STRG.435.1	-3.54783	6.56009	0.58267
rna2449	-2.56274e-15	8.8748	1		rna2449	-0.577736	8.8748	0.860647
ENST00000627622.1	-0.437705	6.48621	1		ENST00000627622.1	-1.12525	6.48621	0.840381
STRG.893.1	-3.9432	6.32016	0.58267		STRG.893.1	-3.45931	6.32016	0.72178
STRG.927.1	-4.32237	6.39577	0.437466		STRG.927.1	-3.55658	6.39577	0.58267
STRG.1085.1	5.35382	6.64534	0.290777		STRG.1085.1	-3.49858	6.64534	0.72178
STRG.1170.1	-3.11331	6.61547	0.72178		STRG.1170.1	-4.96186	6.61547	0.359563
STRG.1171.1	-2.56274e-15	9.31915	1		STRG.1171.1	-8.93964	9.31915	0.0630578
STRG.1173.1	-2.56274e-15	10.9755	1		STRG.1173.1	-7.74693	10.9755	0.0631583
rna4512	-2.56274e-15	6.21148	1		rna4512	-3.93037	6.21148	0.58267
STRG.1402.1	12.8061	12.3734	0.0117728		STRG.1402.1	-2.61691	12.3734	1
sp|Q9H6D7|HAUS4_HUMAN	-3.90998	6.44419	0.58267		sp|Q9H6D7|HAUS4_HUMAN	-0.644745	6.44419	1
STRG.1884.1	3.41511	6.26279	0.72178		STRG.1884.1	-3.47295	6.26279	0.72178
STRG.3314.2	-2.57427	6.09243	1		STRG.3314.2	-2.77849	6.09243	1
STRG.3626.2	-5.49995	6.94917	0.274571		STRG.3626.2	-4.89069	6.94917	0.359563
STRG.3627.1	5.01583	6.48014	0.33224		STRG.3627.1	-2.89809	6.48014	0.72178
STRG.3647.1	5.06226	6.5688	0.33224		STRG.3647.1	-3.55186	6.5688	0.58267
STRG.3758.1	6.66196	7.24154	0.170577		STRG.3758.1	-4.03939	7.24154	0.496767
STRG.4080.4	-2.56274e-15	6.12787	1		STRG.4080.4	-0.275468	6.12787	1
sp|P70213|FV1_MOUSE	2.77177	6.02507	1		sp|P70213|FV1_MOUSE	-1.69123	6.02507	1
STRG.4162.2	2.34202	5.9966	1		STRG.4162.2	-1.72684	5.9966	1
STRG.4224.1	2.82263	6.4765	1		STRG.4224.1	-4.60038	6.4765	0.393594
id194717	0.94416	6.18098	1		id194717	-3.02573	6.18098	0.72178
STRG.4316.1	-4.53693	6.49199	0.437466		STRG.4316.1	-3.8839	6.49199	0.58267
STRG.4577.1	-2.17042	6.03146	1		STRG.4577.1	-2.40713	6.03146	1
rna16974	1.91655	5.96522	1		rna16974	-1.63115	5.96522	1
STRG.4695.1	5.27785	6.64302	0.309722		STRG.4695.1	-3.64795	6.64302	0.58267
rna18160	2.31085	6.03004	1		rna18160	-2.24152	6.03004	1
STRG.4961.1	-2.56274e-15	6.50348	1		STRG.4961.1	0.152631	6.50348	1
STRG.5002.1	-2.56274e-15	6.55897	1		STRG.5002.1	-0.260042	6.55897	1
ENST00000471395.1	5.21231	6.64588	0.309722		ENST00000471395.1	0.559158	6.64588	1
rna18762	-2.56274e-15	11.8284	1		rna18762	-0.861608	11.8284	0.78326
STRG.5238.2	-2.56274e-15	6.16367	1		STRG.5238.2	-1.97118	6.16367	0.72178
STRG.5429.2	-2.56274e-15	6.06323	1		STRG.5429.2	-3.14636	6.06323	0.72178
sp|Q58EC8|RN152_DANRE	0.96393	7.00058	0.830541		sp|Q58EC8|RN152_DANRE	0.6714	7.00058	1
rna20342	-4.27007	13.3161	0.496767		rna20342	-0.649707	13.3161	0.834907
STRG.5566.3	-2.56274e-15	6.10689	1		STRG.5566.3	-1.09651	6.10689	1
rna21027	-2.56274e-15	12.6294	1		rna21027	-0.582635	12.6294	0.851877
STRG.5970.1	3.40835	6.25993	0.72178		STRG.5970.1	-3.45987	6.25993	0.72178
STRG.6688.1	3.14955	6.27603	0.72178		STRG.6688.1	-3.69445	6.27603	0.58267
ENST00000530054.1	-2.56274e-15	6.2583	1		ENST00000530054.1	-4.12024	6.2583	0.496767
ENST00000525085.1	-2.56274e-15	6.05525	1		ENST00000525085.1	0.0321548	6.05525	1
STRG.7774.1	-4.68987	6.59076	0.393594		STRG.7774.1	-4.22002	6.59076	0.496767
STRG.7860.1	5.34019	6.64046	0.290777		STRG.7860.1	-3.48993	6.64046	0.72178
STRG.7904.1	4.14616	6.36091	0.496767		STRG.7904.1	-3.45896	6.36091	0.72178
STRG.8215.1	-2.56274e-15	6.32739	1		STRG.8215.1	-0.273636	6.32739	1
STRG.8321.1	3.73166	6.3092	0.58267		STRG.8321.1	-3.51328	6.3092	0.72178
sp|P61570|ENK25_HUMAN	-2.56274e-15	7.36626	1		sp|P61570|ENK25_HUMAN	0.380481	7.36626	0.967192
STRG.8582.1	2.83549	6.27525	0.72178		STRG.8582.1	-3.80165	6.27525	0.58267
STRG.8964.1	4.0685	11.1415	0.496767		STRG.8964.1	-10.8428	11.1415	0.02754
STRG.9077.1	5.15165	6.58931	0.33224		STRG.9077.1	-3.52546	6.58931	0.58267
STRG.9172.1	-2.56274e-15	7.02853	1		STRG.9172.1	-3.17954	7.02853	0.373853
STRG.9186.1	3.52052	8.51665	0.58267		STRG.9186.1	-7.99789	8.51665	0.0947157
STRG.9214.1	5.4859	7.04593	0.274571		STRG.9214.1	-5.19291	7.04593	0.309722
STRG.9301.1	3.33787	6.09777	0.72178		STRG.9301.1	-2.03925	6.09777	1
rna34576	0.520969	6.16937	1		rna34576	-1.0752	6.16937	1
rna34577	-0.0505882	6.12184	1		rna34577	0.0248782	6.12184	1
ENST00000622337.1	-2.56274e-15	6.13098	1		ENST00000622337.1	-3.54889	6.13098	0.58267
STRG.9682.1	-3.75548	6.36733	0.58267		STRG.9682.1	-3.86215	6.36733	0.58267
STRG.10042.1	-2.56274e-15	6.30001	1		STRG.10042.1	-0.633843	6.30001	1
STRG.10500.1	3.75078	6.31482	0.58267		STRG.10500.1	-3.53253	6.31482	0.58267
STRG.10516.1	-5.35918	6.62937	0.290777		STRG.10516.1	-3.47305	6.62937	0.72178
sp|Q8N143|BCL6B_HUMAN	-0.27201	6.3393	1		sp|Q8N143|BCL6B_HUMAN	-2.6074	6.3393	1
rna39719	0.562587	6.13147	1		rna39719	0.73676	6.13147	1
STRG.11021.1	-2.56274e-15	6.38718	1		STRG.11021.1	-0.643498	6.38718	1
STRG.11057.1	-2.56274e-15	8.08365	1		STRG.11057.1	-7.51474	8.08365	0.117234
STRG.11085.1	-2.56274e-15	6.35454	1		STRG.11085.1	0.00747005	6.35454	1
STRG.11420.2	-2.56274e-15	5.99509	1		STRG.11420.2	-2.6111	5.99509	1
STRG.11615.1	-5.24343	10.1028	0.309722		STRG.11615.1	-9.73729	10.1028	0.0446029
STRG.11631.1	-3.72522	6.30445	0.58267		STRG.11631.1	-3.54126	6.30445	0.58267
STRG.11673.1	4.00741	6.90343	0.496767		STRG.11673.1	-5.47804	6.90343	0.274571
STRG.11688.1	-2.56274e-15	6.56245	1		STRG.11688.1	-5.04386	6.56245	0.33224
rna43142	-2.56274e-15	6.93898	1		rna43142	-1.48256	6.93898	0.665031
STRG.11929.1	-3.75978	6.36935	0.58267		STRG.11929.1	-3.86954	6.36935	0.58267
STRG.11932.1	-4.88006	6.59231	0.359563		STRG.11932.1	-4.03433	6.59231	0.496767
STRG.12167.2	-4.17413	6.19098	0.496767		STRG.12167.2	-1.68022	6.19098	1
rna46546	-2.56274e-15	6.63672	1		rna46546	-5.2215	6.63672	0.309722
STRG.12998.1	4.50876	6.48291	0.437466		STRG.12998.1	-3.81285	6.48291	0.58267
sp|Q3MIT2|PUS10_HUMAN	-2.56274e-15	6.10731	1		sp|Q3MIT2|PUS10_HUMAN	-3.41876	6.10731	0.72178
ENST00000449575.6	-2.56274e-15	7.00784	1		ENST00000449575.6	-5.96271	7.00784	0.227512
STRG.13645.1	-2.56274e-15	6.57346	1		STRG.13645.1	-1.47285	6.57346	0.738665
STRG.14222.1	2.05035	6.55551	1		STRG.14222.1	-4.9259	6.55551	0.359563
STRG.14285.1	3.58962	6.5898	0.58267		STRG.14285.1	-0.137889	6.5898	1
STRG.14374.1	-2.56274e-15	6.24198	1		STRG.14374.1	0.0385555	6.24198	1
STRG.14523.1	-2.56274e-15	6.35284	1		STRG.14523.1	0.360969	6.35284	1
STRG.14924.1	4.01136	6.19944	0.496767		STRG.14924.1	-2.14931	6.19944	1
STRG.14941.1	3.51703	6.29352	0.58267		STRG.14941.1	-3.58849	6.29352	0.58267
STRG.15207.1	3.42691	6.2763	0.72178		STRG.15207.1	-3.52976	6.2763	0.58267
rna55673	-2.56274e-15	12.6328	1		rna55673	-0.545985	12.6328	0.861034
STRG.15413.1	4.0614	6.36227	0.496767		STRG.15413.1	-3.56561	6.36227	0.58267
STRG.15507.1	3.31975	6.37453	0.72178		STRG.15507.1	-4.07518	6.37453	0.496767
STRG.15564.1	-3.0212	6.36267	0.72178		STRG.15564.1	-4.15365	6.36267	0.496767
sp|Q3KRE8|TBB2B_RAT	-2.56274e-15	7.35445	1		sp|Q3KRE8|TBB2B_RAT	-6.52382	7.35445	0.17996
STRG.16581.1	4.40741	6.34856	0.437466		STRG.16581.1	-3.00358	6.34856	0.72178
STRG.16744.1	-2.56274e-15	6.54102	1		STRG.16744.1	1.95359	6.54102	0.597781
rna61235	-2.56274e-15	13.8308	1		rna61235	-1.88502	13.8308	0.553893
STRG.17028.1	-6.15952	8.70822	0.210781		STRG.17028.1	-5.15043	8.70822	0.152947
STRG.17305.1	3.29348	6.73665	0.72178		STRG.17305.1	-5.23366	6.73665	0.309722
STRG.17331.1	3.57375	6.89093	0.58267		STRG.17331.1	-5.5414	6.89093	0.274571
STRG.17334.1	-2.56274e-15	6.33307	1		STRG.17334.1	2.11731	6.33307	0.733968
STRG.17376.1	3.79375	6.27018	0.58267		STRG.17376.1	-3.19519	6.27018	0.72178
STRG.17403.1	4.59674	6.46958	0.393594		STRG.17403.1	-3.62224	6.46958	0.58267
rna63441	-2.56274e-15	6.03238	1		rna63441	-1.19864	6.03238	1
STRG.17487.2	-2.56274e-15	6.01584	1		STRG.17487.2	-2.7958	6.01584	1
STRG.17611.1	-2.81126	6.20846	1		STRG.17611.1	-3.48701	6.20846	0.72178
STRG.17663.1	2.53955	6.33568	1		STRG.17663.1	-4.16021	6.33568	0.496767
STRG.17668.1	5.56681	7.55479	0.274571		STRG.17668.1	-6.37022	7.55479	0.19081
rna64990	-2.90842	6.13373	0.72178		rna64990	-2.9262	6.13373	0.72178
STRG.17953.1	4.23943	6.22093	0.496767		STRG.17953.1	-1.80976	6.22093	1
STRG.17999.2	-2.56274e-15	6.09799	1		STRG.17999.2	-0.00996432	6.09799	1
STRG.18167.1	-2.56274e-15	6.46569	1		STRG.18167.1	-4.79214	6.46569	0.393594
STRG.18247.1	-3.95025	6.70035	0.58267		STRG.18247.1	-4.99353	6.70035	0.359563
STRG.19293.1	-2.56274e-15	6.22711	1		STRG.19293.1	1.60559	6.22711	0.840381
STRG.19479.1	6.52329	7.11567	0.17996		STRG.19479.1	-3.54947	7.11567	0.58267
STRG.19619.1	5.98738	6.89394	0.227512		STRG.19619.1	-3.70224	6.89394	0.58267
STRG.19848.1	5.66559	6.8265	0.260517		STRG.19848.1	-4.04254	6.8265	0.496767
STRG.19856.1	-3.52742	6.22442	0.72178		STRG.19856.1	-3.16929	6.22442	0.72178
STRG.19911.1	3.86503	6.21149	0.58267		STRG.19911.1	-2.59868	6.21149	1
STRG.19911.2	3.18152	6.22438	0.72178		STRG.19911.2	-3.37984	6.22438	0.72178
STRG.19962.1	5.31359	6.51119	0.309722		STRG.19962.1	-2.0538	6.51119	1
STRG.20071.1	-4.32872	7.44447	0.437466		STRG.20071.1	-6.47084	7.44447	0.185179
STRG.20072.1	-4.58707	7.30352	0.393594		STRG.20072.1	-6.17944	7.30352	0.210781
STRG.20081.1	2.909	6.22181	0.72178		STRG.20081.1	-3.50536	6.22181	0.72178
STRG.20358.1	-3.62323	6.32893	0.58267		STRG.20358.1	-3.74556	6.32893	0.58267
STRG.20501.1	-2.56274e-15	6.29107	1		STRG.20501.1	1.78162	6.29107	0.840381
STRG.20524.1	-2.56274e-15	6.59253	1		STRG.20524.1	-5.11698	6.59253	0.33224
STRG.20525.1	-2.56274e-15	6.74071	1		STRG.20525.1	-5.45007	6.74071	0.290777
STRG.20544.1	-2.56274e-15	7.48505	1		STRG.20544.1	-6.71779	7.48505	0.166341
STRG.20544.2	-2.56274e-15	7.04809	1		STRG.20544.2	-6.03378	7.04809	0.218732
STRG.20653.1	-11.832	11.4211	0.017987		STRG.20653.1	-3.98831	11.4211	0.496767
sp|Q3ZBS8|TIM8A_BOVIN	-2.56274e-15	6.38988	1		sp|Q3ZBS8|TIM8A_BOVIN	-1.17747	6.38988	0.888251
STRG.20876.1	-2.56274e-15	6.71635	1		STRG.20876.1	-5.39964	6.71635	0.290777
STRG.20881.1	-2.56274e-15	6.60616	1		STRG.20881.1	-1.24075	6.60616	0.738665
STRG.21054.1	-3.87702	6.14776	0.58267		STRG.21054.1	-1.80458	6.14776	1
STRG.21063.1	-0.722063	6.67182	1		STRG.21063.1	-4.63078	6.67182	0.393594
STRG.21074.1	-2.56274e-15	6.47226	1		STRG.21074.1	-4.81054	6.47226	0.359563
rna76495	-2.56274e-15	6.46532	1		rna76495	-1.12674	6.46532	0.888251
rna76498	-2.56274e-15	8.20204	1		rna76498	-0.608069	8.20204	0.861992
rna76500	2.58264	6.27854	1		rna76500	-1.20449	6.27854	1
STRG.21110.1	-2.56274e-15	7.60438	1		STRG.21110.1	-3.61644	7.60438	0.33506
STRG.21113.1	3.63874	6.69277	0.58267		STRG.21113.1	-5.0432	6.69277	0.33224
STRG.21126.1	3.97909	7.59769	0.496767		STRG.21126.1	-6.74985	7.59769	0.162367
STRG.21128.1	4.01486	6.39149	0.496767		STRG.21128.1	-3.76286	6.39149	0.58267
STRG.21155.1	-2.56274e-15	6.38551	1		STRG.21155.1	-1.21703	6.38551	0.733968
STRG.21158.1	4.74168	6.51697	0.393594		STRG.21158.1	-3.72778	6.51697	0.58267
STRG.21159.1	1.83305	6.18314	1		STRG.21159.1	-3.6063	6.18314	0.58267
STRG.21159.2	2.09356	6.39638	1		STRG.21159.2	-4.44684	6.39638	0.437466
STRG.21162.1	3.67625	6.42496	0.58267		STRG.21162.1	-4.13425	6.42496	0.496767
STRG.21179.1	3.41342	7.90529	0.72178		STRG.21179.1	-7.22575	7.90529	0.132776
STRG.21252.1	2.46546	7.86007	1		STRG.21252.1	-7.19852	7.86007	0.135113
STRG.21259.1	5.90017	6.97328	0.237268		STRG.21259.1	-4.4051	6.97328	0.437466
STRG.21273.1	-2.56274e-15	6.41963	1		STRG.21273.1	-0.414323	6.41963	1
STRG.21272.4	2.87063	6.22871	0.72178		STRG.21272.4	-3.56136	6.22871	0.58267
STRG.21341.1	7.17146	7.52329	0.135113		STRG.21341.1	-4.12635	7.52329	0.496767
STRG.21346.1	3.22356	6.27475	0.72178		STRG.21346.1	-3.63588	6.27475	0.58267
STRG.21359.1	3.3397	6.44362	0.72178		STRG.21359.1	-4.35442	6.44362	0.437466
STRG.21382.1	5.85401	6.86123	0.237268		STRG.21382.1	-3.83598	6.86123	0.58267
STRG.21389.1	3.57263	6.5945	0.58267		STRG.21389.1	-4.77921	6.5945	0.393594
STRG.21402.1	4.01231	6.9294	0.496767		STRG.21402.1	-5.54055	6.9294	0.274571
STRG.21404.1	3.00443	6.22726	0.72178		STRG.21404.1	-3.49254	6.22726	0.72178
STRG.21458.1	3.15891	6.26227	0.72178		STRG.21458.1	-3.61586	6.26227	0.58267
STRG.21480.1	3.64147	6.6314	0.58267		STRG.21480.1	-1.33897	6.6314	0.80444
STRG.21482.1	-2.56274e-15	6.6368	1		STRG.21482.1	-1.81398	6.6368	0.685338
rna77390	1.44126	7.58409	0.680297		rna77390	0.0265201	7.58409	1
STRG.21506.1	-2.56274e-15	6.52497	1		STRG.21506.1	-1.02562	6.52497	0.80444
STRG.21570.1	-2.56274e-15	6.86903	1		STRG.21570.1	-1.52525	6.86903	0.700387
STRG.21572.1	3.12128	6.272	0.72178		STRG.21572.1	-3.67055	6.272	0.58267
STRG.21021.1	-2.56274e-15	6.69513	1		STRG.21021.1	-5.35109	6.69513	0.290777
STRG.21040.1	-2.56274e-15	6.25196	1		STRG.21040.1	-2.37845	6.25196	0.58267
STRG.21044.1	-3.79152	6.95453	0.58267		STRG.21044.1	-5.64751	6.95453	0.260517
STRG.21088.1	-2.56274e-15	6.39126	1		STRG.21088.1	-4.5754	6.39126	0.393594
STRG.21146.1	4.20137	6.37984	0.496767		STRG.21146.1	-3.52218	6.37984	0.58267
STRG.21221.1	-2.56274e-15	6.3177	1		STRG.21221.1	-2.57794	6.3177	0.496767
STRG.21221.2	-2.56274e-15	6.1649	1		STRG.21221.2	-1.83034	6.1649	0.72178
STRG.21424.1	-2.56274e-15	6.53947	1		STRG.21424.1	0.119051	6.53947	1
STRG.21535.1	3.03884	6.19201	0.72178		STRG.21535.1	-3.23105	6.19201	0.72178
STRG.21609.1	2.81237	6.74544	1		STRG.21609.1	-5.32259	6.74544	0.309722
rna77673	-2.56274e-15	6.27694	1		rna77673	-0.774621	6.27694	0.840381
STRG.14.1	-0.295929	6.9202	1		STRG.14.1	-4.01456	6.9202	0.496767
STRG.14.2	4.56593	6.2383	0.393594		STRG.14.2	0	6.2383	1
STRG.83.1	4.58414	6.24274	0.393594		STRG.83.1	0	6.24274	1
rna272	1.563	5.94303	1		rna272	1.38324	5.94303	1
STRG.209.1	6.8491	7.26898	0.155108		STRG.209.1	3.23887	7.26898	0.72178
rna1043	4.4646	6.50665	0.437466		rna1043	3.90885	6.50665	0.58267
STRG.461.1	4.73068	6.27942	0.393594		STRG.461.1	0	6.27942	1
STRG.499.1	5.45112	6.50263	0.290777		STRG.499.1	0	6.50263	1
rna2115	3.37599	6.029	0.72178		rna2115	0	6.029	1
STRG.797.1	5.05949	6.37177	0.33224		STRG.797.1	0	6.37177	1
STRG.909.1	-6.59563	10.9543	0.0820902		STRG.909.1	0	10.9543	1
rna3006	2.05821	5.92	1		rna3006	0	5.92	1
rna3007	2.007	6.04208	1		rna3007	2.4926	6.04208	1
rna3017	6.51678	7.30228	0.17996		rna3017	4.78722	7.30228	0.393594
STRG.1049.1	5.16055	7.21498	0.33224		STRG.1049.1	5.78034	7.21498	0.248189
STRG.1057.1	3.52274	6.64009	0.58267		STRG.1057.1	4.8653	6.64009	0.359563
STRG.1067.1	5.44987	6.50138	0.290777		STRG.1067.1	0	6.50138	1
rna3343	4.36963	6.45166	0.437466		rna3343	3.70487	6.45166	0.58267
STRG.1093.2	3.77981	6.08493	0.58267		STRG.1093.2	0	6.08493	1
STRG.1102.1	3.72114	7.50067	0.325034		STRG.1102.1	0	7.50067	1
STRG.1200.1	-10.0531	12.6329	0.0224279		STRG.1200.1	0	12.6329	1
rna3852	-0.2093	6.38203	1		rna3852	0	6.38203	1
STRG.1325.1	6.59432	7.02411	0.175106		STRG.1325.1	0	7.02411	1
rna4924	4.00302	6.12236	0.496767		rna4924	0	6.12236	1
rna5572	3.00502	6.08745	0.72178		rna5572	2.25861	6.08745	1
rna6015	3.26671	6.01753	0.72178		rna6015	0	6.01753	1
rna6047	1.82606	5.99169	1		rna6047	2.0351	5.99169	1
gene2626	3.10733	6.2774	0.72178		gene2626	3.64059	6.2774	0.58267
rna6532	-1.46454	5.98409	1		rna6532	0	5.98409	1
STRG.2100.1	3.15423	6.41192	0.72178		STRG.2100.1	4.2203	6.41192	0.496767
rna7190	2.67022	6.09829	1		rna7190	2.64611	6.09829	1
rna7226	1.53219	5.93112	1		rna7226	1.20777	5.93112	1
rna7229	1.42492	6.07989	1		rna7229	2.99026	6.07989	0.72178
Borrelia_orfX	5.19755	6.72732	0.309722		Borrelia_orfX	1.28464	6.72732	0.840381
sp|A6PWD2|FHAD1_MOUSE	2.91454	5.98028	0.72178		sp|A6PWD2|FHAD1_MOUSE	0	5.98028	1
rna8586	3.77786	6.08479	0.58267		rna8586	0	6.08479	1
STRG.2805.1	4.35292	6.42643	0.437466		STRG.2805.1	3.57523	6.42643	0.58267
STRG.2836.1	3.81061	6.18065	0.58267		STRG.2836.1	2.26641	6.18065	1
STRG.2880.1	-0.951749	6.8684	0.770426		STRG.2880.1	0	6.8684	1
rna9107	6.51279	7.48879	0.17996		rna9107	5.52734	7.48879	0.274571
rna9254	3.64072	6.06467	0.58267		rna9254	0	6.06467	1
STRG.2960.1	4.35827	6.19137	0.437466		STRG.2960.1	0	6.19137	1
STRG.2996.1	3.51979	6.19764	0.58267		STRG.2996.1	2.82073	6.19764	0.72178
STRG.3019.2	4.51115	6.69403	0.437466		STRG.3019.2	4.65372	6.69403	0.393594
STRG.3031.1	4.97497	6.67002	0.359563		STRG.3031.1	4.19115	6.67002	0.496767
STRG.3037.1	5.26963	6.58766	0.309722		STRG.3037.1	3.14653	6.58766	0.72178
STRG.3073.1	4.02034	6.12529	0.496767		STRG.3073.1	0	6.12529	1
rna9829	3.77922	6.2389	0.58267		rna9829	2.89633	6.2389	0.72178
STRG.3145.1	-1.10641	6.84216	0.770426		STRG.3145.1	0	6.84216	1
rna11082	5.11528	6.38918	0.33224		rna11082	0	6.38918	1
rna11252	5.42101	6.80278	0.290777		rna11252	4.26778	6.80278	0.496767
STRG.3581.2	3.56464	6.05461	0.58267		STRG.3581.2	0	6.05461	1
STRG.3582.1	-1.30285	6.25097	0.888251		STRG.3582.1	0	6.25097	1
STRG.3607.1	5.34067	6.46294	0.290777		STRG.3607.1	0	6.46294	1
STRG.3634.1	-0.547468	6.23917	1		STRG.3634.1	0	6.23917	1
STRG.3638.1	4.31979	6.18344	0.437466		STRG.3638.1	0	6.18344	1
STRG.3713.1	1.10771	6.5121	0.78873		STRG.3713.1	0	6.5121	1
rna12418	5.99605	6.9229	0.227512		rna12418	3.82288	6.9229	0.58267
sp|Q4R7Q1|NSUN7_MACFA	2.15266	6.00867	1		sp|Q4R7Q1|NSUN7_MACFA	-2.10188	6.00867	1
STRG.3993.1	6.86433	7.17761	0.155108		STRG.3993.1	0	7.17761	1
STRG.4127.1	4.76103	6.28734	0.393594		STRG.4127.1	0	6.28734	1
STRG.4128.1	4.51706	6.22706	0.437466		STRG.4128.1	0	6.22706	1
rna13425	5.57174	6.7515	0.274571		rna13425	3.70228	6.7515	0.58267
ENST00000440056.1	4.69568	6.54453	0.393594		ENST00000440056.1	3.87447	6.54453	0.58267
rna13496	3.04311	5.99256	0.72178		rna13496	0	5.99256	1
rna13495	3.41977	6.03596	0.72178		rna13495	0	6.03596	1
STRG.4277.1	-1.0749	6.24723	0.888251		STRG.4277.1	0	6.24723	1
STRG.4331.2	3.527	6.71725	0.373853		STRG.4331.2	0	6.71725	1
ENST00000406451.8	4.90237	6.47205	0.359563		ENST00000406451.8	3.02631	6.47205	0.72178
rna14651	3.18615	6.05504	0.72178		rna14651	1.48987	6.05504	1
rna15082	7.49162	7.58086	0.11892		rna15082	0	7.58086	1
rna15291	2.54314	5.95045	1		rna15291	0	5.95045	1
STRG.4844.1	3.03202	6.05851	0.72178		STRG.4844.1	1.81978	6.05851	1
STRG.4897.1	2.81335	6.52826	1		STRG.4897.1	-4.7637	6.52826	0.393594
rna15670	2.62655	5.95611	1		rna15670	0	5.95611	1
STRG.4965.1	0.0745717	6.53996	1		STRG.4965.1	0	6.53996	1
STRG.5079.1	9.20955	8.94757	0.0562161		STRG.5079.1	0	8.94757	1
rna16436	1.89298	6.22624	0.733968		rna16436	1.5749	6.22624	1
rna16442	0.896618	6.50694	0.872036		rna16442	0	6.50694	1
STRG.5277.1	2.89788	6.46459	0.72178		STRG.5277.1	-4.54848	6.46459	0.437466
STRG.5325.1	-1.40489	6.13494	0.840381		STRG.5325.1	0	6.13494	1
STRG.5594.1	4.07952	6.13633	0.496767		STRG.5594.1	0	6.13633	1
STRG.5669.1	4.85067	6.5718	0.359563		STRG.5669.1	-3.89875	6.5718	0.58267
STRG.5714.1	-0.375779	6.40337	1		STRG.5714.1	0	6.40337	1
rna18343	5.01372	6.35819	0.33224		rna18343	0	6.35819	1
STRG.5720.1	3.65654	6.31512	0.58267		STRG.5720.1	3.53368	6.31512	0.58267
rna18668	7.00528	7.58788	0.145653		rna18668	5.07546	7.58788	0.33224
STRG.5903.1	5.20499	6.41827	0.309722		STRG.5903.1	0	6.41827	1
STRG.5964.1	4.0048	6.41886	0.496767		STRG.5964.1	3.84495	6.41886	0.58267
STRG.6038.1	5.88016	6.72876	0.237268		STRG.6038.1	2.13715	6.72876	1
STRG.6134.1	5.18648	6.41205	0.309722		STRG.6134.1	0	6.41205	1
STRG.6375.1	5.25456	6.43379	0.309722		STRG.6375.1	0	6.43379	1
STRG.6407.1	6.0316	6.73944	0.218732		STRG.6407.1	0	6.73944	1
sp|Q9JJZ2|TBA8_MOUSE	-0.853057	6.24472	0.840381		sp|Q9JJZ2|TBA8_MOUSE	-2.46995	6.24472	1
STRG.6480.4	1.83932	6.0069	1		STRG.6480.4	2.21509	6.0069	1
STRG.6542.1	3.56403	6.6335	0.58267		STRG.6542.1	4.83581	6.6335	0.359563
STRG.6665.1	4.77325	6.33373	0.393594		STRG.6665.1	1.61341	6.33373	1
STRG.6806.1	0.106935	6.42923	1		STRG.6806.1	0	6.42923	1
rna23091	3.72206	6.07727	0.58267		rna23091	0	6.07727	1
STRG.7308.1	0.0997012	6.80319	1		STRG.7308.1	-5.1708	6.80319	0.33224
STRG.7562.1	4.26975	6.17294	0.496767		STRG.7562.1	0	6.17294	1
STRG.7567.1	-0.830465	6.26467	0.888251		STRG.7567.1	0	6.26467	1
rna24335	5.27181	6.4398	0.309722		rna24335	0	6.4398	1
rna24834	2.75563	5.96678	1		rna24834	0	5.96678	1
rna25086	7.21984	7.67	0.132776		rna25086	4.93088	7.67	0.359563
STRG.7872.1	4.08505	6.29892	0.496767		STRG.7872.1	3.0225	6.29892	0.72178
rna25852	3.88178	6.68707	0.429164		rna25852	3.12421	6.68707	0.72178
ENST00000281031.4	4.76154	6.459	0.393594		ENST00000281031.4	3.22165	6.459	0.72178
rna26065	1.50555	6.58827	0.700387		rna26065	0	6.58827	1
sp|Q14980|NUMA1_HUMAN	6.73025	7.10053	0.166341		sp|Q14980|NUMA1_HUMAN	0	7.10053	1
rna26588	5.95548	6.977	0.227512		rna26588	4.26701	6.977	0.496767
STRG.8341.1	4.13225	6.35083	0.496767		STRG.8341.1	3.34786	6.35083	0.72178
STRG.8412.1	3.37098	6.1467	0.72178		STRG.8412.1	-2.58414	6.1467	1
rna27178	5.26791	6.43877	0.309722		rna27178	0	6.43877	1
STRG.8664.1	2.09856	6.29197	1		STRG.8664.1	3.98969	6.29197	0.496767
STRG.8664.2	1.66115	6.21715	1		STRG.8664.2	3.72985	6.21715	0.58267
STRG.8683.1	5.65462	6.57895	0.260517		STRG.8683.1	0	6.57895	1
rna28082	5.45415	6.94319	0.290777		rna28082	2.31154	6.94319	0.597781
STRG.8831.1	-0.457019	6.60959	0.941239		STRG.8831.1	0	6.60959	1
STRG.9076.1	3.81089	6.09069	0.58267		STRG.9076.1	0	6.09069	1
Gln-synt_C	4.60922	6.24881	0.393594		Gln-synt_C	0	6.24881	1
STRG.9229.1	3.5941	6.72845	0.58267		STRG.9229.1	5.0961	6.72845	0.33224
STRG.9312.1	6.01339	6.73237	0.227512		STRG.9312.1	0	6.73237	1
STRG.9342.1	5.66193	6.58263	0.260517		STRG.9342.1	0	6.58263	1
STRG.9399.1	6.62955	7.04529	0.170577		STRG.9399.1	0	7.04529	1
STRG.9423.1	5.25747	6.43527	0.309722		STRG.9423.1	0	6.43527	1
STRG.9477.1	9.24054	8.97614	0.055491		STRG.9477.1	0	8.97614	1
STRG.9511.1	3.31688	6.17963	0.72178		STRG.9511.1	2.88539	6.17963	0.72178
rna30691	6.38236	8.00379	0.19081		rna30691	6.85566	8.00379	0.155108
STRG.9604.1	5.75144	6.61904	0.248189		STRG.9604.1	0	6.61904	1
STRG.9605.1	1.92594	7.04556	0.592842		STRG.9605.1	0	7.04556	1
STRG.9671.1	-1.66851	7.72008	0.620974		STRG.9671.1	0	7.72008	1
rna31930	0.376304	6.45525	1		rna31930	-2.03655	6.45525	1
sp|Q4V8E5|MFSD3_RAT	-1.07882	6.30006	0.80444		sp|Q4V8E5|MFSD3_RAT	0	6.30006	1
STRG.10015.1	3.06477	6.07688	0.72178		STRG.10015.1	2.04331	6.07688	1
STRG.10017.1	4.34615	6.18878	0.437466		STRG.10017.1	0	6.18878	1
STRG.10026.1	6.40136	6.91908	0.19081		STRG.10026.1	0	6.91908	1
rna32248	3.42202	6.0353	0.72178		rna32248	0	6.0353	1
sp|Q9CQG6|TM147_MOUSE	4.00697	7.57887	0.308102		sp|Q9CQG6|TM147_MOUSE	4.97724	7.57887	0.359563
STRG.10111.3	2.1659	5.99147	1		STRG.10111.3	-1.84134	5.99147	1
gene13682	2.37366	5.93868	1		gene13682	0	5.93868	1
ENST00000549591.1	4.80516	6.2991	0.359563		ENST00000549591.1	0	6.2991	1
rna32517	2.1939	5.99149	1		rna32517	1.73211	5.99149	1
STRG.10284.1	-0.862336	6.19702	1		STRG.10284.1	0	6.19702	1
rna33200	4.80866	6.40262	0.359563		rna33200	2.56513	6.40262	1
rna33201	3.52936	6.15298	0.58267		rna33201	2.37406	6.15298	1
STRG.10509.1	4.2205	6.2653	0.496767		STRG.10509.1	2.42008	6.2653	1
STRG.10526.2	3.14953	6.06956	0.72178		STRG.10526.2	1.81198	6.06956	1
STRG.10707.2	2.99554	5.98767	0.72178		STRG.10707.2	0	5.98767	1
STRG.10800.1	3.38047	6.51287	0.72178		STRG.10800.1	-4.58672	6.51287	0.393594
STRG.10824.1	3.29572	6.35849	0.72178		STRG.10824.1	3.95088	6.35849	0.496767
STRG.10898.1	5.61837	6.56509	0.260517		STRG.10898.1	0	6.56509	1
sp|Q5TAB7|RIPP2_HUMAN	5.09729	6.38319	0.33224		sp|Q5TAB7|RIPP2_HUMAN	0	6.38319	1
STRG.10963.2	3.22173	6.0124	0.72178		STRG.10963.2	0	6.0124	1
rna35248	1.05942	6.53878	0.822605		rna35248	0	6.53878	1
STRG.11261.1	5.43208	6.49595	0.290777		STRG.11261.1	0	6.49595	1
rna36080	5.67212	6.7118	0.260517		rna36080	3.05133	6.7118	0.72178
ENST00000587569.5	4.05019	6.13057	0.496767		ENST00000587569.5	0	6.13057	1
rna36738	4.8438	6.30959	0.359563		rna36738	0	6.30959	1
ENST00000588687.5	-0.921046	6.41117	0.888251		ENST00000588687.5	-3.01523	6.41117	0.72178
rna38044	3.91955	6.1078	0.58267		rna38044	0	6.1078	1
rna38975	5.30958	6.58752	0.309722		rna38975	3.05883	6.58752	0.72178
Borrelia_REV	4.10715	6.25486	0.496767		Borrelia_REV	2.57731	6.25486	1
sp|O75352|MPU1_HUMAN	0.672504	8.01755	0.849349		sp|O75352|MPU1_HUMAN	-3.40047	8.01755	0.345956
ENST00000413242.6	3.9512	6.11353	0.496767		ENST00000413242.6	0	6.11353	1
rna39948	5.75988	6.7786	0.248189		rna39948	3.39776	6.7786	0.72178
rna40175	1.25736	6.19259	1		rna40175	3.66678	6.19259	0.58267
STRG.12751.1	3.30493	6.32832	0.72178		STRG.12751.1	3.80829	6.32832	0.58267
rna40536	2.93039	5.9827	0.72178		rna40536	0	5.9827	1
rna40803	2.49356	6.4496	0.55082		rna40803	-2.44002	6.4496	1
rna40802	0.49663	6.12663	1		rna40802	-2.78366	6.12663	1
STRG.12887.1	0.919919	6.24919	0.888251		STRG.12887.1	0	6.24919	1
STRG.12956.1	3.54851	6.81158	0.58267		STRG.12956.1	5.30442	6.81158	0.309722
rna41129	4.77024	6.28978	0.393594		rna41129	0	6.28978	1
STRG.13097.1	4.65641	6.42866	0.393594		STRG.13097.1	3.18039	6.42866	0.72178
rna41598	3.03427	5.99263	0.72178		rna41598	0	5.99263	1
rna41621	5.77726	6.77509	0.248189		rna41621	3.30771	6.77509	0.72178
STRG.13263.1	3.39358	6.32204	0.72178		STRG.13263.1	3.73546	6.32204	0.58267
STRG.13331.1	4.94762	6.78739	0.359563		STRG.13331.1	-4.75631	6.78739	0.393594
rna42296	1.91782	6.20312	0.733968		rna42296	1.26215	6.20312	1
STRG.13394.1	-1.56115	6.12476	0.840381		STRG.13394.1	0	6.12476	1
sp|Q9CWK3|CD2B2_MOUSE	-0.0536371	7.68455	1		sp|Q9CWK3|CD2B2_MOUSE	0	7.68455	1
sp|Q7Z6L0|PRRT2_HUMAN	5.41815	6.56797	0.290777		sp|Q7Z6L0|PRRT2_HUMAN	2.34263	6.56797	1
rna43141	2.95119	7.20402	0.72178		rna43141	6.15715	7.20402	0.210781
STRG.13675.2	3.8133	6.17727	0.58267		STRG.13675.2	2.21767	6.17727	1
rna43239	3.71661	6.1532	0.58267		rna43239	2.01744	6.1532	1
STRG.13854.1	3.34791	6.98482	0.72178		STRG.13854.1	5.71228	6.98482	0.248189
rna43966	5.65515	6.75725	0.260517		rna43966	3.54449	6.75725	0.58267
rna44071	4.51454	6.22638	0.437466		rna44071	0	6.22638	1
STRG.13965.1	4.65294	6.5324	0.393594		STRG.13965.1	-3.91752	6.5324	0.58267
rna44407	4.76649	6.46497	0.393594		rna44407	3.26573	6.46497	0.72178
STRG.14049.3	3.99859	6.24892	0.496767		STRG.14049.3	-2.75596	6.24892	1
STRG.14134.1	4.30125	6.50466	0.437466		STRG.14134.1	-4.11105	6.50466	0.496767
STRG.14383.1	5.43732	6.49693	0.290777		STRG.14383.1	0	6.49693	1
STRG.14406.1	7.30333	7.61682	0.1284		STRG.14406.1	4.19602	7.61682	0.496767
STRG.14463.1	4.95101	6.58803	0.359563		STRG.14463.1	-3.85437	6.58803	0.58267
STRG.14476.1	5.16007	6.99967	0.33224		STRG.14476.1	5.22725	6.99967	0.309722
STRG.14549.1	4.7077	6.27349	0.393594		STRG.14549.1	0	6.27349	1
STRG.14606.1	3.93775	6.38546	0.58267		STRG.14606.1	-3.79804	6.38546	0.58267
rna46412	3.49735	6.04455	0.72178		rna46412	0	6.04455	1
STRG.14748.1	4.46292	6.21458	0.437466		STRG.14748.1	0	6.21458	1
rna47002	3.29527	6.20123	0.72178		rna47002	3.04788	6.20123	0.72178
STRG.14952.1	5.46598	6.50745	0.290777		STRG.14952.1	0	6.50745	1
STRG.15171.1	6.43575	6.93993	0.185179		STRG.15171.1	0	6.93993	1
STRG.15234.1	4.4337	6.20789	0.437466		STRG.15234.1	0	6.20789	1
STRG.15244.1	3.46665	6.24627	0.72178		STRG.15244.1	3.25617	6.24627	0.72178
rna48870	4.82921	6.69199	0.359563		rna48870	-4.48824	6.69199	0.437466
STRG.15694.1	2.41745	6.10299	1		STRG.15694.1	2.85164	6.10299	0.72178
STRG.15780.1	5.19114	6.8169	0.309722		STRG.15780.1	-4.65752	6.8169	0.393594
STRG.15841.1	5.93786	6.69665	0.227512		STRG.15841.1	0	6.69665	1
STRG.15841.2	5.18046	6.40932	0.309722		STRG.15841.2	0	6.40932	1
STRG.15844.1	6.01252	6.90571	0.227512		STRG.15844.1	3.63169	6.90571	0.58267
STRG.16024.1	5.24529	6.66715	0.309722		STRG.16024.1	3.80619	6.66715	0.58267
rna51261	2.57346	5.95299	1		rna51261	0	5.95299	1
STRG.16253.1	5.12904	6.39327	0.33224		STRG.16253.1	0	6.39327	1
STRG.16255.1	7.93735	12.4502	0.0976865		STRG.16255.1	-12.1325	12.4502	0.0157238
STRG.16604.1	3.35925	6.13597	0.72178		STRG.16604.1	2.42957	6.13597	1
STRG.16752.1	-4.14242	8.52576	0.23531		STRG.16752.1	0	8.52576	1
STRG.16765.1	3.96631	6.34479	0.496767		STRG.16765.1	3.47426	6.34479	0.72178
STRG.16822.1	7.69326	7.82813	0.108282		STRG.16822.1	-3.83244	7.82813	0.58267
rna53774	6.67971	7.09326	0.166341		rna53774	1.50891	7.09326	1
STRG.17091.1	7.2225	7.40287	0.132776		STRG.17091.1	0	7.40287	1
STRG.17225.1	4.24141	6.16736	0.496767		STRG.17225.1	0	6.16736	1
STRG.17240.1	-2.61972	6.76262	0.518235		STRG.17240.1	3.23071	6.76262	0.72178
STRG.17308.1	-0.230313	6.34496	1		STRG.17308.1	0	6.34496	1
STRG.17356.1	-1.18129	6.35621	0.80444		STRG.17356.1	0	6.35621	1
rna55222	1.61156	5.94269	1		rna55222	1.3903	5.94269	1
STRG.17425.1	5.43974	6.6384	0.290777		STRG.17425.1	3.14128	6.6384	0.72178
STRG.17572.1	4.63927	6.2562	0.393594		STRG.17572.1	0	6.2562	1
ENST00000498360.5	3.34191	6.02498	0.72178		ENST00000498360.5	0	6.02498	1
STRG.18004.1	3.49678	6.42029	0.58267		STRG.18004.1	4.13134	6.42029	0.496767
rna57286	3.01393	6.09095	0.72178		rna57286	2.26638	6.09095	1
STRG.18163.1	4.13923	6.24759	0.496767		STRG.18163.1	-2.47759	6.24759	1
sp|Q8WVV5|BT2A2_HUMAN	2.57189	6.0149	1		sp|Q8WVV5|BT2A2_HUMAN	1.7734	6.0149	1
ENST00000476358.5	2.5556	6.16496	1		ENST00000476358.5	3.23124	6.16496	0.72178
STRG.18443.1	6.49218	6.96972	0.17996		STRG.18443.1	0	6.96972	1
rna59494	5.13626	6.57001	0.33224		rna59494	3.34167	6.57001	0.72178
rna59495	3.08001	5.99659	0.72178		rna59495	0	5.99659	1
rna59544	3.19929	6.26814	0.72178		rna59544	3.53847	6.26814	0.58267
rna59543	2.53818	6.02072	1		rna59543	1.87861	6.02072	1
STRG.18694.1	3.80965	10.1743	0.58267		STRG.18694.1	9.83235	10.1743	0.0426919
rna59661	5.12736	6.54807	0.33224		rna59661	3.18949	6.54807	0.72178
STRG.18730.1	3.0378	6.25669	0.72178		STRG.18730.1	3.5559	6.25669	0.58267
rna59911	1.9173	6.50862	0.685338		rna59911	2.58774	6.50862	1
STRG.18893.1	11.5182	11.1073	0.0206072		STRG.18893.1	0	11.1073	1
STRG.18934.1	3.68996	6.14314	0.58267		STRG.18934.1	1.97667	6.14314	1
rna60424	3.65431	6.34363	0.58267		rna60424	3.69641	6.34363	0.58267
STRG.18984.1	0.331302	6.2658	1		STRG.18984.1	2.4464	6.2658	1
STRG.18996.1	3.69728	6.25747	0.58267		STRG.18996.1	3.12323	6.25747	0.72178
STRG.19032.1	3.29874	6.63347	0.72178		STRG.19032.1	-4.9706	6.63347	0.359563
STRG.19088.1	12.1517	11.7312	0.0156431		STRG.19088.1	3.18129	11.7312	0.72178
STRG.19117.1	3.60951	6.23305	0.58267		STRG.19117.1	3.02254	6.23305	0.72178
rna60903	4.11737	6.1433	0.496767		rna60903	0	6.1433	1
STRG.19224.1	3.90008	6.10494	0.58267		STRG.19224.1	0	6.10494	1
rna61300	3.25173	6.21825	0.72178		rna61300	3.20409	6.21825	0.72178
STRG.19307.1	2.11556	6.38292	1		STRG.19307.1	4.32922	6.38292	0.437466
STRG.19310.1	5.86529	7.02888	0.237268		STRG.19310.1	-4.72721	7.02888	0.393594
STRG.19310.2	5.12635	6.39262	0.33224		STRG.19310.2	0	6.39262	1
STRG.19421.1	2.86488	6.38233	0.72178		STRG.19421.1	4.1868	6.38233	0.496767
rna62100	4.83297	6.47312	0.359563		rna62100	3.19402	6.47312	0.72178
rna62234	3.34963	6.02592	0.72178		rna62234	0	6.02592	1
STRG.19689.1	5.71784	6.6045	0.248189		STRG.19689.1	0	6.6045	1
STRG.19761.1	5.38374	6.47815	0.290777		STRG.19761.1	0	6.47815	1
rna62850	6.29068	7.16888	0.196908		rna62850	4.59635	7.16888	0.393594
STRG.19816.1	4.58801	6.49191	0.393594		STRG.19816.1	-3.76947	6.49191	0.58267
STRG.19908.1	2.82874	6.60722	1		STRG.19908.1	4.91598	6.60722	0.359563
STRG.19917.1	4.45633	6.45387	0.437466		STRG.19917.1	-3.69924	6.45387	0.58267
STRG.19923.1	3.49897	6.98284	0.58267		STRG.19923.1	5.68872	6.98284	0.260517
STRG.19944.1	-0.251182	6.44866	1		STRG.19944.1	0	6.44866	1
STRG.19947.2	5.16385	6.46591	0.33224		STRG.19947.2	2.05354	6.46591	1
rna63314	5.0704	6.45402	0.33224		rna63314	2.29336	6.45402	1
STRG.19950.1	3.27777	6.37691	0.72178		STRG.19950.1	4.03602	6.37691	0.496767
STRG.19963.1	5.26644	6.43793	0.309722		STRG.19963.1	0	6.43793	1
STRG.19976.1	5.56013	6.54317	0.274571		STRG.19976.1	0	6.54317	1
STRG.20083.1	5.83779	6.82517	0.237268		STRG.20083.1	-3.59881	6.82517	0.58267
rna63918	2.87858	5.9775	0.72178		rna63918	0	5.9775	1
STRG.20232.1	5.10817	6.38711	0.33224		STRG.20232.1	0	6.38711	1
rna64504	7.2807	7.99426	0.13054		rna64504	6.12208	7.99426	0.210781
rna64786	3.40765	6.03349	0.72178		rna64786	0	6.03349	1
STRG.20484.1	8.36503	8.33296	0.0808018		STRG.20484.1	-4.20454	8.33296	0.496767
STRG.20488.1	8.54775	8.43057	0.0750762		STRG.20488.1	-3.28259	8.43057	0.72178
STRG.20530.1	3.93612	6.34047	0.58267		STRG.20530.1	-3.54211	6.34047	0.58267
STRG.20550.1	4.8654	6.60299	0.359563		STRG.20550.1	3.98049	6.60299	0.496767
STRG.20571.1	3.17485	7.29878	0.72178		STRG.20571.1	-6.35344	7.29878	0.19081
STRG.20672.1	-1.32852	6.40042	0.738665		STRG.20672.1	0	6.40042	1
STRG.20699.1	-1.37278	6.34127	0.80444		STRG.20699.1	0	6.34127	1
rna66109	3.16007	6.00515	0.72178		rna66109	0	6.00515	1
STRG.20821.1	4.57463	6.84721	0.393594		STRG.20821.1	0.551504	6.84721	0.914066
rna66254	3.1557	6.04618	0.72178		rna66254	1.39	6.04618	1
rna66258	5.43813	6.78235	0.290777		rna66258	4.14121	6.78235	0.496767
STRG.20840.1	-4.05917	7.44482	0.276585		STRG.20840.1	0	7.44482	1
STRG.20867.1	5.13962	6.57008	0.33224		STRG.20867.1	3.34031	6.57008	0.72178
STRG.20888.1	5.36134	6.71204	0.290777		STRG.20888.1	-3.93035	6.71204	0.58267
STRG.21035.1	-0.922611	7.09895	1		STRG.21035.1	-5.8006	7.09895	0.248189
rna67264	7.23045	7.7449	0.132776		rna67264	5.28198	7.7449	0.309722
STRG.21290.1	2.55809	6.2164	1		STRG.21290.1	3.53024	6.2164	0.58267
STRG.21298.1	3.34656	6.069	0.72178		STRG.21298.1	1.46089	6.069	1
ENST00000400454.5	5.07853	6.37776	0.33224		ENST00000400454.5	0	6.37776	1
rna69253	4.3876	6.19789	0.437466		rna69253	0	6.19789	1
STRG.21690.1	3.43607	6.12957	0.72178		STRG.21690.1	2.21413	6.12957	1
rna69438	3.22965	6.14814	0.72178		rna69438	2.66824	6.14814	1
STRG.21799.1	4.20299	6.23773	0.496767		STRG.21799.1	2.1518	6.23773	1
STRG.21805.1	3.40506	6.32102	0.72178		STRG.21805.1	3.72451	6.32102	0.58267
rna69776	-2.40112	6.26538	0.656827		rna69776	0	6.26538	1
rna69811	3.87736	6.33099	0.58267		rna69811	3.45617	6.33099	0.72178
rna69907	4.59328	6.24501	0.393594		rna69907	0	6.24501	1
STRG.21945.1	3.42746	6.49347	0.72178		STRG.21945.1	4.43426	6.49347	0.437466
rna70226	4.82889	7.06076	0.359563		rna70226	1.19973	7.06076	0.741126
STRG.22009.1	4.31362	6.32385	0.437466		STRG.22009.1	2.88921	6.32385	0.72178
STRG.22201.1	5.56563	6.54478	0.274571		STRG.22201.1	0	6.54478	1
STRG.22261.1	3.08083	6.30848	0.72178		STRG.22261.1	3.80287	6.30848	0.58267
STRG.22262.1	4.81141	6.30076	0.359563		STRG.22262.1	0	6.30076	1
STRG.22269.1	2.8532	6.19059	0.72178		STRG.22269.1	3.26364	6.19059	0.72178
STRG.22323.1	5.09501	6.45594	0.33224		STRG.22323.1	2.23592	6.45594	1
ENST00000469660.1	-0.476341	6.2041	1		ENST00000469660.1	-3.29027	6.2041	0.72178
STRG.22373.1	4.31457	6.3247	0.437466		STRG.22373.1	2.89533	6.3247	0.72178
STRG.22374.1	3.92677	6.10867	0.58267		STRG.22374.1	0	6.10867	1
rna71615	5.57442	6.82634	0.274571		rna71615	4.15315	6.82634	0.496767
STRG.22448.1	4.22883	6.16455	0.496767		STRG.22448.1	0	6.16455	1
rna72248	2.1295	5.9836	1		rna72248	1.66051	5.9836	1
STRG.22591.1	5.61581	6.56341	0.260517		STRG.22591.1	0	6.56341	1
STRG.22606.1	3.16359	6.29802	0.72178		STRG.22606.1	3.72295	6.29802	0.58267
rna72721	6.46914	7.51528	0.185179		rna72721	5.66277	7.51528	0.260517
rna72872	2.48852	6.15011	1		rna72872	3.15444	6.15011	0.72178
STRG.22871.1	4.48325	6.21912	0.437466		STRG.22871.1	0	6.21912	1
STRG.22873.1	4.1123	6.14249	0.496767		STRG.22873.1	0	6.14249	1
STRG.22897.1	1.76526	8.2364	1		STRG.22897.1	7.66924	8.2364	0.109651
STRG.22908.1	3.8522	6.41122	0.58267		STRG.22908.1	3.90965	6.41122	0.58267
STRG.22974.1	2.19537	6.20143	1		STRG.22974.1	3.55391	6.20143	0.58267
STRG.23068.1	5.35429	6.46761	0.290777		STRG.23068.1	0	6.46761	1
rna73675	3.58515	6.05672	0.58267		rna73675	0	6.05672	1
STRG.23107.1	3.30965	6.40006	0.72178		STRG.23107.1	4.12093	6.40006	0.496767
STRG.23171.1	4.4791	6.42435	0.437466		STRG.23171.1	3.40714	6.42435	0.72178
STRG.23202.1	3.59627	8.46761	0.58267		STRG.23202.1	7.91931	8.46761	0.0976865
STRG.23214.1	5.85025	6.65951	0.237268		STRG.23214.1	0	6.65951	1
STRG.23217.1	4.20827	6.35782	0.496767		STRG.23217.1	3.2928	6.35782	0.72178
STRG.23263.1	7.01598	7.48509	0.145653		STRG.23263.1	4.44041	7.48509	0.437466
rna74307	2.09364	5.98121	1		rna74307	1.62349	5.98121	1
ENST00000356450.2	4.57495	6.24059	0.393594		ENST00000356450.2	0	6.24059	1
STRG.23404.1	3.42567	6.37173	0.72178		STRG.23404.1	3.95207	6.37173	0.496767
STRG.23410.1	4.17962	6.46676	0.496767		STRG.23410.1	3.95194	6.46676	0.496767
STRG.23411.1	3.26729	6.40724	0.72178		STRG.23411.1	4.16503	6.40724	0.496767
STRG.23413.1	5.28205	6.61503	0.309722		STRG.23413.1	3.35104	6.61503	0.72178
STRG.23416.1	3.93652	6.5525	0.58267		STRG.23416.1	4.45048	6.5525	0.437466
STRG.23518.1	5.18849	6.57716	0.309722		STRG.23518.1	3.26575	6.57716	0.72178
STRG.23522.1	5.79508	6.93461	0.248189		STRG.23522.1	4.3417	6.93461	0.437466
STRG.23532.1	6.18034	7.16202	0.210781		STRG.23532.1	4.76243	7.16202	0.393594
STRG.23557.1	4.52037	6.64096	0.437466		STRG.23557.1	4.45619	6.64096	0.437466
STRG.23640.1	3.86059	6.88827	0.58267		STRG.23640.1	5.42952	6.88827	0.290777
STRG.23701.1	2.90454	6.35815	0.72178		STRG.23701.1	4.08129	6.35815	0.496767
rna75446	-0.141807	6.36418	1		rna75446	-4.12454	6.36418	0.496767
STRG.23726.1	7.52075	7.78121	0.117234		STRG.23726.1	4.48102	7.78121	0.437466
STRG.23767.1	5.99317	6.72372	0.227512		STRG.23767.1	0	6.72372	1
STRG.23784.2	4.05202	6.25943	0.496767		STRG.23784.2	2.6916	6.25943	1
STRG.23800.1	5.78644	6.94145	0.248189		STRG.23800.1	4.38667	6.94145	0.437466
STRG.23812.1	5.71308	7.02094	0.248189		STRG.23812.1	4.83624	7.02094	0.359563
STRG.23824.1	3.60961	6.59522	0.58267		STRG.23824.1	4.70872	6.59522	0.393594
STRG.23828.1	4.60423	6.98758	0.393594		STRG.23828.1	5.45661	6.98758	0.274571
STRG.23830.1	3.60025	7.5488	0.58267		STRG.23830.1	6.67691	7.5488	0.166341
STRG.23831.1	4.82609	6.52778	0.359563		STRG.23831.1	3.59744	6.52778	0.58267
STRG.23836.1	6.60198	7.28448	0.175106		STRG.23836.1	4.49061	7.28448	0.437466
STRG.24062.1	7.28103	7.43851	0.13054		STRG.24062.1	0	7.43851	1
STRG.24063.1	4.62517	6.58979	0.393594		STRG.24063.1	4.16542	6.58979	0.496767
STRG.24070.1	6.3161	6.8758	0.196908		STRG.24070.1	0	6.8758	1
STRG.24072.4	4.50894	6.22497	0.437466		STRG.24072.4	0	6.22497	1
STRG.24078.1	5.97916	6.71532	0.227512		STRG.24078.1	0	6.71532	1
STRG.24084.1	6.32751	6.9954	0.196908		STRG.24084.1	3.19985	6.9954	0.72178
rna76559	2.62049	6.16062	1		rna76559	1.02783	6.16062	1
STRG.24120.1	7.87416	8.02501	0.0998063		STRG.24120.1	4.64315	8.02501	0.393594
STRG.24121.1	10.0491	9.70822	0.039048		STRG.24121.1	0	9.70822	1
STRG.24127.1	5.41369	6.48921	0.290777		STRG.24127.1	0	6.48921	1
STRG.24131.1	6.12967	7.30186	0.210781		STRG.24131.1	5.35786	7.30186	0.290777
STRG.24137.1	5.76672	7.01241	0.248189		STRG.24137.1	4.73744	7.01241	0.393594
STRG.24138.1	4.49679	6.22222	0.437466		STRG.24138.1	0	6.22222	1
STRG.24140.1	5.66021	7.49445	0.260517		STRG.24140.1	6.1708	7.49445	0.210781
STRG.24142.1	5.81513	6.64423	0.248189		STRG.24142.1	0	6.64423	1
STRG.24145.1	5.43121	6.74453	0.290777		STRG.24145.1	3.94404	6.74453	0.496767
STRG.24152.1	7.55185	7.62631	0.11561		STRG.24152.1	0	7.62631	1
STRG.24154.1	5.99188	6.72254	0.227512		STRG.24154.1	0	6.72254	1
STRG.24157.1	5.16035	6.534	0.33224		STRG.24157.1	2.9715	6.534	0.72178
STRG.24176.1	4.92955	6.60754	0.359563		STRG.24176.1	3.93211	6.60754	0.58267
rna76689	4.82468	6.55277	0.359563		rna76689	3.75548	6.55277	0.58267
STRG.24179.1	5.40213	6.48527	0.290777		STRG.24179.1	0	6.48527	1
STRG.24182.1	5.01203	6.35755	0.33224		STRG.24182.1	0	6.35755	1
STRG.24190.1	10.829	10.4432	0.0278137		STRG.24190.1	0	10.4432	1
STRG.24191.1	5.74672	6.61742	0.248189		STRG.24191.1	0	6.61742	1
STRG.24208.1	7.25613	7.42589	0.13054		STRG.24208.1	0	7.42589	1
rna76764	3.08914	5.99658	0.72178		rna76764	0	5.99658	1
STRG.24210.1	4.27456	6.36646	0.496767		STRG.24210.1	3.28227	6.36646	0.72178
STRG.24218.1	7.09989	7.32528	0.140126		STRG.24218.1	0	7.32528	1
STRG.24226.1	5.55678	6.7035	0.274571		STRG.24226.1	3.3768	6.7035	0.72178
STRG.24237.1	6.25179	6.84452	0.203538		STRG.24237.1	0	6.84452	1
STRG.24258.1	4.51698	6.44157	0.437466		STRG.24258.1	3.48527	6.44157	0.72178
STRG.24259.1	6.55654	7.11574	0.175106		STRG.24259.1	3.2886	7.11574	0.72178
STRG.24280.1	6.37374	7.02545	0.19081		STRG.24280.1	3.27946	7.02545	0.72178
STRG.24281.1	4.29037	7.24667	0.437466		STRG.24281.1	6.07907	7.24667	0.218732
STRG.24282.1	4.94972	6.74744	0.359563		STRG.24282.1	4.54339	6.74744	0.437466
STRG.24284.1	6.24729	6.84133	0.203538		STRG.24284.1	0	6.84133	1
STRG.24287.1	3.69891	6.17026	0.58267		STRG.24287.1	2.33609	6.17026	1
STRG.24288.1	4.49816	6.42415	0.437466		STRG.24288.1	3.38985	6.42415	0.72178
STRG.24300.1	5.5805	6.55108	0.274571		STRG.24300.1	0	6.55108	1
STRG.24304.1	6.9452	7.22885	0.148636		STRG.24304.1	0	7.22885	1
STRG.24311.1	4.21687	6.16252	0.496767		STRG.24311.1	0	6.16252	1
STRG.24313.1	4.05054	6.45542	0.496767		STRG.24313.1	3.99361	6.45542	0.496767
STRG.24319.1	4.15787	6.15081	0.496767		STRG.24319.1	0	6.15081	1
STRG.24327.1	3.08009	6.17782	0.72178		STRG.24327.1	3.04968	6.17782	0.72178
STRG.24328.1	9.14309	8.88905	0.0577432		STRG.24328.1	0	8.88905	1
STRG.24341.1	4.04441	6.41767	0.496767		STRG.24341.1	3.81558	6.41767	0.58267
STRG.24354.1	4.66499	6.59332	0.393594		STRG.24354.1	4.14593	6.59332	0.496767
STRG.24368.1	4.17767	6.38508	0.496767		STRG.24368.1	3.51911	6.38508	0.58267
STRG.24377.1	4.1043	6.36658	0.496767		STRG.24377.1	3.47852	6.36658	0.72178
STRG.24378.1	5.30703	6.95738	0.309722		STRG.24378.1	4.99702	6.95738	0.33224
STRG.24392.1	4.97091	6.34545	0.359563		STRG.24392.1	0	6.34545	1
STRG.24394.1	6.82364	7.24612	0.15863		STRG.24394.1	3.14359	7.24612	0.72178
STRG.24404.1	4.11748	6.34222	0.496767		STRG.24404.1	3.30582	6.34222	0.72178
STRG.24409.1	4.94613	6.33832	0.359563		STRG.24409.1	0	6.33832	1
STRG.24410.1	5.58084	7.73617	0.274571		STRG.24410.1	6.66204	7.73617	0.170577
STRG.24411.1	4.43006	6.56258	0.437466		STRG.24411.1	4.20309	6.56258	0.496767
STRG.24422.1	7.1309	7.34148	0.137561		STRG.24422.1	0	7.34148	1
STRG.24428.1	4.02149	6.73771	0.496767		STRG.24428.1	4.99899	6.73771	0.33224
rna77227	4.77278	6.50275	0.393594		rna77227	3.5246	6.50275	0.58267
STRG.24441.1	4.86076	6.46428	0.359563		STRG.24441.1	3.07458	6.46428	0.72178
STRG.24441.2	2.74101	6.14357	1		STRG.24441.2	2.99928	6.14357	0.72178
STRG.24448.1	6.53301	7.19765	0.17996		STRG.24448.1	4.13583	7.19765	0.496767
STRG.24451.1	3.34821	6.50269	0.72178		STRG.24451.1	4.48684	6.50269	0.437466
STRG.24453.1	3.44776	6.84715	0.72178		STRG.24453.1	5.40437	6.84715	0.290777
STRG.24454.1	7.43289	7.82104	0.12067		STRG.24454.1	5.10609	7.82104	0.33224
rna77242	5.34752	6.98418	0.290777		rna77242	5.05492	6.98418	0.33224
STRG.24458.1	4.59633	6.4311	0.393594		STRG.24458.1	3.29942	6.4311	0.72178
STRG.24472.1	3.29451	7.12121	0.72178		STRG.24472.1	5.98049	7.12121	0.227512
STRG.24475.1	4.61755	6.57453	0.393594		STRG.24475.1	4.10249	6.57453	0.496767
rna77328	4.07007	6.48931	0.496767		rna77328	4.12667	6.48931	0.496767
STRG.24552.1	3.71972	6.31795	0.58267		STRG.24552.1	3.5147	6.31795	0.58267
STRG.24553.1	4.7345	6.4751	0.393594		STRG.24553.1	3.39748	6.4751	0.72178
STRG.24556.1	4.45129	6.36435	0.437466		STRG.24556.1	3.00875	6.36435	0.72178
STRG.24566.1	5.0487	6.53578	0.33224		STRG.24566.1	3.26617	6.53578	0.72178
STRG.24567.1	5.85093	6.98662	0.237268		STRG.24567.1	4.50298	6.98662	0.437466
rna77516	-0.840085	6.50421	0.80444		rna77516	3.37234	6.50421	0.72178
STRG.23948.1	5.0985	6.38417	0.33224		STRG.23948.1	0	6.38417	1
STRG.23966.1	5.07993	6.37807	0.33224		STRG.23966.1	0	6.37807	1
STRG.23969.1	4.69502	6.3535	0.393594		STRG.23969.1	2.30497	6.3535	1
STRG.23986.1	3.49975	6.53643	0.58267		STRG.23986.1	4.55436	6.53643	0.393594
STRG.24026.1	5.50831	6.52331	0.274571		STRG.24026.1	0	6.52331	1
STRG.24039.1	4.9236	6.49977	0.359563		STRG.24039.1	3.24019	6.49977	0.72178
STRG.24043.1	5.06166	6.37259	0.33224		STRG.24043.1	0	6.37259	1
STRG.24047.1	5.35381	6.7198	0.290777		STRG.24047.1	3.93412	6.7198	0.58267
STRG.24049.2	6.23762	6.83677	0.203538		STRG.24049.2	0	6.83677	1
STRG.24055.1	4.37152	6.36849	0.437466		STRG.24055.1	3.17007	6.36849	0.72178
STRG.24056.1	4.68779	6.6168	0.393594		STRG.24056.1	4.23065	6.6168	0.496767
STRG.24086.1	5.39	6.48047	0.290777		STRG.24086.1	0	6.48047	1
STRG.24089.1	4.6854	6.76881	0.393594		STRG.24089.1	4.80134	6.76881	0.359563
STRG.24103.1	4.28454	6.17599	0.496767		STRG.24103.1	0	6.17599	1
STRG.24162.1	4.64398	6.46741	0.393594		STRG.24162.1	3.48191	6.46741	0.72178
STRG.24167.1	6.59937	7.02537	0.175106		STRG.24167.1	0	7.02537	1
rna76787	3.87346	6.68428	0.429164		rna76787	3.12421	6.68428	0.72178
STRG.24413.1	5.40519	6.8404	0.290777		STRG.24413.1	4.46402	6.8404	0.437466
STRG.24418.1	8.81652	8.64524	0.0666128		STRG.24418.1	3.27813	8.64524	0.72178
rna77201	2.52291	5.94812	1		rna77201	0	5.94812	1
STRG.24434.1	3.6931	6.28568	0.58267		STRG.24434.1	3.33761	6.28568	0.72178
rna77259	0.35241	6.28846	1		rna77259	0	6.28846	1
rna77268	4.58663	6.40652	0.393594		rna77268	3.12421	6.40652	0.72178
STRG.24490.1	4.16306	6.42968	0.496767		STRG.24490.1	3.78414	6.42968	0.58267
STRG.24492.1	3.93666	6.35588	0.58267		STRG.24492.1	3.56569	6.35588	0.58267
rna77278	3.87346	6.68428	0.429164		rna77278	3.12421	6.68428	0.72178
STRG.24530.1	7.44959	7.63869	0.12067		STRG.24530.1	3.39352	7.63869	0.72178
STRG.24531.1	9.63085	9.34244	0.046753		STRG.24531.1	2.93688	9.34244	0.72178
STRG.24578.1	5.88308	6.88943	0.237268		STRG.24578.1	3.89698	6.88943	0.58267
rna77628	7.19395	7.42503	0.135113		rna77628	2.38158	7.42503	1
sp|Q1EGL2|LGI1_PANTR	-2.56274e-15	6.10481	1		sp|Q1EGL2|LGI1_PANTR	3.31545	6.10481	0.72178
rna2893	-2.56274e-15	6.0493	1		rna2893	2.9611	6.0493	0.72178
STRG.1043.1	5.72038	7.07292	0.248189		STRG.1043.1	5.02111	7.07292	0.33224
STRG.1556.1	4.17249	16.3393	0.496767		STRG.1556.1	16.0809	16.3393	0.00282556
rna5859	3.58065	6.10371	0.58267		rna5859	1.467	6.10371	1
STRG.1857.5	-2.56274e-15	6.07853	1		STRG.1857.5	3.15894	6.07853	0.72178
rna7230	-2.56274e-15	5.95649	1		rna7230	2.12316	5.95649	1
STRG.2660.1	2.05063	6.50815	1		STRG.2660.1	4.72859	6.50815	0.393594
sp|Q06889|EGR3_HUMAN	3.46319	6.21245	0.72178		sp|Q06889|EGR3_HUMAN	2.98531	6.21245	0.72178
STRG.2843.1	4.46331	6.42963	0.437466		STRG.2843.1	3.45556	6.42963	0.72178
STRG.2905.1	-3.76251	6.42518	0.58267		STRG.2905.1	4.04906	6.42518	0.496767
STRG.2919.1	-2.56274e-15	6.24056	1		STRG.2919.1	0.866393	6.24056	1
STRG.3005.1	6.73481	7.258	0.162367		STRG.3005.1	3.83495	7.258	0.58267
STRG.3039.1	5.12008	6.45675	0.33224		STRG.3039.1	2.09476	6.45675	1
rna12663	-2.56274e-15	6.74716	1		rna12663	5.39548	6.74716	0.290777
STRG.4729.1	-3.9781	6.19426	0.496767		STRG.4729.1	2.17976	6.19426	1
STRG.4784.4	2.81222	6.02305	0.72178		STRG.4784.4	1.48728	6.02305	1
STRG.4844.2	3.70188	6.21566	0.58267		STRG.4844.2	2.75199	6.21566	1
rna15944	-2.56274e-15	6.16178	1		rna15944	3.61771	6.16178	0.58267
STRG.4914.1	-4.52208	6.40049	0.437466		STRG.4914.1	3.24837	6.40049	0.72178
STRG.5229.1	-3.80795	6.25827	0.58267		STRG.5229.1	3.06924	6.25827	0.72178
STRG.5479.2	-2.56274e-15	6.17412	1		STRG.5479.2	3.67856	6.17412	0.58267
STRG.5479.3	-2.56274e-15	6.11853	1		STRG.5479.3	3.39505	6.11853	0.72178
STRG.5479.5	-2.56274e-15	5.98861	1		STRG.5479.5	2.46983	5.98861	1
STRG.5497.1	4.12078	6.32565	0.496767		STRG.5497.1	3.15211	6.32565	0.72178
STRG.5537.1	-2.56274e-15	6.30665	1		STRG.5537.1	4.21777	6.30665	0.496767
STRG.5922.1	3.59433	6.35666	0.58267		STRG.5922.1	3.78299	6.35666	0.58267
STRG.5962.1	3.62712	6.27718	0.58267		STRG.5962.1	3.30513	6.27718	0.72178
STRG.6197.1	-2.56274e-15	6.72187	1		STRG.6197.1	-0.560207	6.72187	0.930201
STRG.6460.1	-2.56274e-15	7.05988	1		STRG.6460.1	6.00332	7.05988	0.227512
STRG.6531.1	5.06412	6.51919	0.33224		STRG.6531.1	3.06728	6.51919	0.72178
STRG.6666.1	3.28532	6.22365	0.72178		STRG.6666.1	3.19839	6.22365	0.72178
STRG.6908.1	3.30206	7.74704	0.72178		STRG.6908.1	6.98557	7.74704	0.145653
STRG.7926.1	-2.56274e-15	7.36259	1		STRG.7926.1	6.49541	7.36259	0.17996
STRG.8072.1	-3.53239	6.25715	0.58267		STRG.8072.1	3.30021	6.25715	0.72178
STRG.8120.1	-2.56274e-15	6.34808	1		STRG.8120.1	4.35938	6.34808	0.437466
STRG.8177.1	-2.56274e-15	6.43486	1		STRG.8177.1	4.63061	6.43486	0.393594
STRG.8319.1	-2.56274e-15	10.4914	1		STRG.8319.1	10.1764	10.4914	0.0367529
STRG.8423.1	0.0933029	6.48563	1		STRG.8423.1	3.57128	6.48563	0.58267
STRG.8844.1	4.74489	6.33388	0.393594		STRG.8844.1	1.71795	6.33388	1
STRG.8879.1	-3.74302	6.54527	0.58267		STRG.8879.1	4.51965	6.54527	0.437466
STRG.9223.1	-2.56274e-15	7.44703	1		STRG.9223.1	6.62256	7.44703	0.170577
STRG.9224.1	5.4596	6.88868	0.290777		STRG.9224.1	0.112537	6.88868	1
STRG.9230.1	5.57809	8.02493	0.274571		STRG.9230.1	7.14326	8.02493	0.137561
STRG.9464.1	2.92785	6.17028	0.72178		STRG.9464.1	3.04857	6.17028	0.72178
STRG.9502.1	-2.56274e-15	6.22175	1		STRG.9502.1	3.88994	6.22175	0.58267
STRG.9639.1	-2.56274e-15	6.27621	1		STRG.9639.1	4.10639	6.27621	0.496767
STRG.9904.1	2.31715	6.00623	1		STRG.9904.1	1.8015	6.00623	1
rna33199	4.55821	6.46939	0.393594		rna33199	3.59693	6.46939	0.58267
ENST00000368986.8	-2.56274e-15	6.49534	1		ENST00000368986.8	4.79894	6.49534	0.359563
STRG.11840.1	2.28435	5.99851	1		STRG.11840.1	1.71081	5.99851	1
STRG.11955.1	4.42156	6.7341	0.437466		STRG.11955.1	4.83113	6.7341	0.359563
STRG.12193.1	-2.56274e-15	6.6042	1		STRG.12193.1	5.07904	6.6042	0.33224
STRG.12496.1	4.02608	6.57516	0.496767		STRG.12496.1	4.48357	6.57516	0.437466
STRG.13089.1	-2.56274e-15	6.2188	1		STRG.13089.1	3.87758	6.2188	0.58267
STRG.13314.1	-2.56274e-15	6.29709	1		STRG.13314.1	4.18318	6.29709	0.496767
STRG.13327.1	5.1806	6.47952	0.309722		STRG.13327.1	2.17139	6.47952	1
STRG.14011.1	-3.44392	6.25222	0.72178		STRG.14011.1	3.33015	6.25222	0.72178
STRG.14157.1	7.1289	7.66737	0.137561		STRG.14157.1	5.1636	7.66737	0.309722
STRG.14305.1	-2.56274e-15	6.40251	1		STRG.14305.1	4.53205	6.40251	0.437466
rna47710	4.11123	6.37178	0.496767		rna47710	3.48045	6.37178	0.58267
STRG.14524.1	-3.03784	6.45795	0.72178		STRG.14524.1	4.42845	6.45795	0.437466
STRG.16093.1	2.65396	6.64532	1		STRG.16093.1	5.03374	6.64532	0.33224
STRG.16152.1	3.64642	6.29531	0.58267		STRG.16152.1	3.40655	6.29531	0.72178
STRG.16188.1	-4.21368	6.31541	0.496767		STRG.16188.1	3.03144	6.31541	0.72178
STRG.16352.1	-2.56274e-15	6.15357	1		STRG.16352.1	3.57947	6.15357	0.58267
STRG.17085.1	-2.56274e-15	6.92783	1		STRG.17085.1	5.7635	6.92783	0.248189
STRG.18529.1	6.80058	7.179	0.15863		STRG.18529.1	2.09609	7.179	1
STRG.18915.1	-4.52975	6.44333	0.437466		STRG.18915.1	3.53185	6.44333	0.58267
STRG.18993.1	-3.82107	6.44415	0.58267		STRG.18993.1	4.10109	6.44415	0.496767
STRG.19033.1	2.83729	6.34164	0.72178		STRG.19033.1	4.01978	6.34164	0.496767
STRG.19121.1	-4.9674	6.87065	0.359563		STRG.19121.1	4.98719	6.87065	0.33224
STRG.19400.1	-3.55074	6.24481	0.58267		STRG.19400.1	3.20346	6.24481	0.72178
STRG.19401.1	-2.56274e-15	6.43312	1		STRG.19401.1	2.63213	6.43312	0.656827
STRG.19453.2	-2.56274e-15	6.09068	1		STRG.19453.2	-1.21448	6.09068	1
STRG.19547.2	1.78033	5.96534	1		STRG.19547.2	1.58391	5.96534	1
STRG.19633.1	-2.56274e-15	6.93662	1		STRG.19633.1	5.78099	6.93662	0.248189
STRG.19636.1	3.77028	6.9606	0.58267		STRG.19636.1	5.60376	6.9606	0.260517
STRG.20044.1	-2.56274e-15	7.85815	1		STRG.20044.1	-4.0694	7.85815	0.286136
STRG.20320.1	-2.56274e-15	6.4611	1		STRG.20320.1	-0.561811	6.4611	1
STRG.20416.1	-2.56274e-15	6.72017	1		STRG.20416.1	1.32249	6.72017	0.78873
STRG.20420.2	-2.56274e-15	5.97821	1		STRG.20420.2	2.35962	5.97821	1
STRG.20536.1	-3.8334	6.28334	0.58267		STRG.20536.1	3.22742	6.28334	0.72178
STRG.20562.1	-2.56274e-15	7.72297	1		STRG.20562.1	-4.71013	7.72297	0.233459
STRG.20993.1	-3.68936	6.34455	0.58267		STRG.20993.1	3.70505	6.34455	0.58267
sp|P56693|SOX10_HUMAN	4.04371	6.36536	0.496767		sp|P56693|SOX10_HUMAN	3.50545	6.36536	0.58267
sp|Q694B5|ABC3C_GORGO	-3.68346	6.28631	0.58267		sp|Q694B5|ABC3C_GORGO	-0.0770883	6.28631	1
STRG.21732.1	2.99367	6.18554	0.72178		STRG.21732.1	3.11916	6.18554	0.72178
STRG.21959.1	2.67006	6.16015	1		STRG.21959.1	3.11348	6.16015	0.72178
STRG.21974.1	-2.56274e-15	6.99364	1		STRG.21974.1	5.88514	6.99364	0.237268
STRG.22477.1	-2.56274e-15	6.39516	1		STRG.22477.1	4.51089	6.39516	0.437466
STRG.22636.1	7.15033	7.46807	0.137561		STRG.22636.1	3.62607	7.46807	0.58267
STRG.22915.1	7.47076	7.75345	0.11892		STRG.22915.1	4.53458	7.75345	0.437466
STRG.23139.1	4.23418	6.40273	0.496767		STRG.23139.1	3.55003	6.40273	0.58267
STRG.23172.1	6.18394	6.94313	0.210781		STRG.23172.1	3.33407	6.94313	0.72178
STRG.23183.1	6.33659	7.05704	0.196908		STRG.23183.1	3.75921	7.05704	0.58267
STRG.23233.1	3.6663	6.24785	0.58267		STRG.23233.1	3.06193	6.24785	0.72178
STRG.23248.1	-2.56274e-15	6.75905	1		STRG.23248.1	5.42542	6.75905	0.290777
STRG.23261.1	-2.56274e-15	7.22902	1		STRG.23261.1	6.28492	7.22902	0.196908
STRG.23265.1	-2.56274e-15	6.81603	1		STRG.23265.1	5.54609	6.81603	0.274571
STRG.23409.1	-2.56274e-15	6.63129	1		STRG.23409.1	5.14344	6.63129	0.33224
STRG.23478.1	5.02196	6.51063	0.33224		STRG.23478.1	3.09343	6.51063	0.72178
STRG.23488.1	4.77138	6.77174	0.393594		STRG.23488.1	4.76066	6.77174	0.393594
STRG.23492.1	-2.56274e-15	7.00255	1		STRG.23492.1	5.89394	7.00255	0.237268
STRG.23505.1	-2.56274e-15	6.75022	1		STRG.23505.1	5.40776	6.75022	0.290777
STRG.23506.2	-2.56274e-15	6.05442	1		STRG.23506.2	2.99604	6.05442	0.72178
STRG.23512.1	-2.56274e-15	6.38123	1		STRG.23512.1	4.46623	6.38123	0.437466
STRG.23538.1	-2.56274e-15	7.76368	1		STRG.23538.1	7.06928	7.76368	0.14282
STRG.23542.1	-2.56274e-15	6.37899	1		STRG.23542.1	4.45983	6.37899	0.437466
STRG.23545.1	-2.56274e-15	6.84378	1		STRG.23545.1	5.59647	6.84378	0.260517
STRG.23546.1	-2.56274e-15	6.39009	1		STRG.23546.1	4.49482	6.39009	0.437466
STRG.23547.1	-2.56274e-15	6.66582	1		STRG.23547.1	5.22348	6.66582	0.309722
rna77164	-2.3778	6.58254	0.512387		rna77164	3.07783	6.58254	0.72178
STRG.23556.1	-2.56274e-15	6.39074	1		STRG.23556.1	4.49676	6.39074	0.437466
STRG.23560.1	-2.56274e-15	6.45747	1		STRG.23560.1	4.69413	6.45747	0.393594
STRG.23564.1	-2.56274e-15	6.52959	1		STRG.23564.1	4.89032	6.52959	0.359563
STRG.23571.1	-2.56274e-15	6.57253	1		STRG.23571.1	4.99763	6.57253	0.33224
STRG.23573.1	-2.56274e-15	6.6826	1		STRG.23573.1	5.25629	6.6826	0.309722
STRG.23585.1	-2.56274e-15	6.46441	1		STRG.23585.1	4.71315	6.46441	0.393594
STRG.23586.1	-2.56274e-15	6.45215	1		STRG.23586.1	4.67879	6.45215	0.393594
STRG.23603.1	6.7361	7.36088	0.162367		STRG.23603.1	4.57449	7.36088	0.393594
STRG.23604.1	-2.56274e-15	7.04773	1		STRG.23604.1	5.98105	7.04773	0.227512
STRG.23605.1	-2.56274e-15	6.56559	1		STRG.23605.1	4.98457	6.56559	0.359563
STRG.23609.1	-2.56274e-15	6.34578	1		STRG.23609.1	4.35229	6.34578	0.437466
STRG.23616.1	-2.56274e-15	6.51051	1		STRG.23616.1	4.84055	6.51051	0.359563
STRG.23624.1	-2.56274e-15	6.51169	1		STRG.23624.1	4.84208	6.51169	0.359563
STRG.23625.1	-2.56274e-15	6.4957	1		STRG.23625.1	4.79937	6.4957	0.359563
STRG.23649.1	-2.56274e-15	7.74902	1		STRG.23649.1	7.04532	7.74902	0.14282
STRG.23651.1	-2.56274e-15	7.7644	1		STRG.23651.1	7.06541	7.7644	0.14282
STRG.23673.1	-2.56274e-15	7.01135	1		STRG.23673.1	5.91256	7.01135	0.237268
STRG.23678.1	3.79132	6.39769	0.58267		STRG.23678.1	3.87055	6.39769	0.58267
STRG.23688.1	-2.56274e-15	6.42442	1		STRG.23688.1	4.5986	6.42442	0.393594
STRG.23693.1	-2.56274e-15	6.99001	1		STRG.23693.1	5.8782	6.99001	0.237268
STRG.23694.1	3.90435	6.88255	0.58267		STRG.23694.1	5.40169	6.88255	0.290777
STRG.23695.1	3.65407	6.90052	0.58267		STRG.23695.1	5.48765	6.90052	0.274571
STRG.23708.1	5.09002	6.92672	0.33224		STRG.23708.1	5.05469	6.92672	0.33224
STRG.23709.1	3.31579	8.28774	0.72178		STRG.23709.1	7.69881	8.28774	0.108282
STRG.23710.1	4.11685	6.33264	0.496767		STRG.23710.1	3.20922	6.33264	0.72178
STRG.23712.1	-2.56274e-15	8.22606	1		STRG.23712.1	7.66128	8.22606	0.109651
STRG.23720.1	3.56419	6.81031	0.58267		STRG.23720.1	5.29464	6.81031	0.309722
STRG.23725.1	-2.56274e-15	7.23804	1		STRG.23725.1	6.29385	7.23804	0.196908
STRG.23727.1	-2.56274e-15	6.49635	1		STRG.23727.1	4.8007	6.49635	0.359563
STRG.23730.1	-2.56274e-15	7.00926	1		STRG.23730.1	5.90554	7.00926	0.237268
STRG.23735.1	4.10473	6.56563	0.496767		STRG.23735.1	4.40959	6.56563	0.437466
STRG.23751.1	-2.56274e-15	6.61626	1		STRG.23751.1	5.10367	6.61626	0.33224
STRG.23763.1	5.97341	6.98286	0.227512		STRG.23763.1	4.26402	6.98286	0.496767
STRG.23795.1	3.51299	6.82947	0.58267		STRG.23795.1	5.35568	6.82947	0.290777
STRG.23796.1	4.18154	6.56445	0.496767		STRG.23796.1	4.36385	6.56445	0.437466
STRG.23809.1	4.78618	6.7552	0.359563		STRG.23809.1	4.69206	6.7552	0.393594
STRG.23817.1	3.59028	7.26799	0.58267		STRG.23817.1	6.21865	7.26799	0.203538
STRG.23833.1	4.66667	6.95622	0.393594		STRG.23833.1	5.3503	6.95622	0.290777
STRG.23834.1	4.21414	7.43923	0.496767		STRG.23834.1	6.43036	7.43923	0.185179
STRG.23847.1	4.98545	6.52029	0.359563		STRG.23847.1	3.25831	6.52029	0.72178
STRG.23050.1	4.62251	6.44405	0.393594		STRG.23050.1	3.33073	6.44405	0.72178
STRG.23206.1	-2.56274e-15	6.18931	1		STRG.23206.1	3.7477	6.18931	0.58267
STRG.23228.1	-2.56274e-15	6.63967	1		STRG.23228.1	5.1603	6.63967	0.33224
STRG.23463.1	-2.56274e-15	6.29059	1		STRG.23463.1	4.15971	6.29059	0.496767
STRG.23513.1	-2.56274e-15	6.55848	1		STRG.23513.1	4.96346	6.55848	0.359563
STRG.23514.1	-2.56274e-15	6.91039	1		STRG.23514.1	5.72595	6.91039	0.248189
STRG.23553.1	-2.56274e-15	8.75973	1		STRG.23553.1	8.3005	8.75973	0.0827512
STRG.23639.1	-2.56274e-15	6.6191	1		STRG.23639.1	5.1127	6.6191	0.33224
STRG.23733.1	-2.56274e-15	7.17652	1		STRG.23733.1	6.19409	7.17652	0.203538
STRG.23792.1	5.35212	6.6856	0.290777		STRG.23792.1	3.71966	6.6856	0.58267
STRG.23804.1	7.42928	7.73014	0.12067		STRG.23804.1	4.54763	7.73014	0.437466
STRG.23845.1	3.64855	6.29358	0.58267		STRG.23845.1	3.39413	6.29358	0.72178
STRG.23873.1	-2.56274e-15	6.32971	1		STRG.23873.1	4.29792	6.32971	0.437466
STRG.23880.1	3.51908	6.75562	0.58267		STRG.23880.1	5.17569	6.75562	0.309722
STRG.23889.1	7.42017	7.65952	0.122488		STRG.23889.1	3.94329	7.65952	0.496767
STRG.23911.1	-2.56274e-15	6.37486	1		STRG.23911.1	4.4465	6.37486	0.437466
STRG.23913.1	-2.56274e-15	6.49301	1		STRG.23913.1	4.7943	6.49301	0.359563
STRG.23922.1	4.87639	6.51467	0.359563		STRG.23922.1	3.42408	6.51467	0.72178
STRG.155.1	-10.271	9.91336	0.0354299		STRG.155.1	-1.63562	9.91336	1
rna2661	0.109435	6.00275	1		rna2661	0	6.00275	1
STRG.715.2	-0.334488	5.97198	1		STRG.715.2	0	5.97198	1
STRG.901.6	-0.241745	6.12094	1		STRG.901.6	0	6.12094	1
STRG.1038.1	3.04839	7.2042	0.398376		STRG.1038.1	0	7.2042	1
gene1669	-0.863465	6.39266	0.888251		gene1669	2.93223	6.39266	0.72178
STRG.1498.1	-0.898669	6.34142	0.914066		STRG.1498.1	0	6.34142	1
STRG.1660.1	-2.14146	6.08113	1		STRG.1660.1	-2.87617	6.08113	0.72178
STRG.1660.2	-3.17012	6.10135	0.72178		STRG.1660.2	-2.37153	6.10135	1
STRG.1854.2	-3.68194	6.11299	0.58267		STRG.1854.2	1.62944	6.11299	1
STRG.2021.2	0.192443	6.19906	1		STRG.2021.2	0	6.19906	1
STRG.2027.1	-1.39486	6.42642	0.685338		STRG.2027.1	0	6.42642	1
rna7661	-4.4513	6.44663	0.437466		rna7661	-3.7174	6.44663	0.58267
STRG.2704.1	-0.995137	6.91233	0.792082		STRG.2704.1	0	6.91233	1
rna11241	-0.617629	6.43245	1		rna11241	-3.57533	6.43245	0.58267
STRG.3398.1	-3.51548	6.58691	0.72178		STRG.3398.1	4.71974	6.58691	0.393594
STRG.3933.1	-3.97666	6.72065	0.496767		STRG.3933.1	4.97681	6.72065	0.359563
STRG.3964.1	-3.97384	6.43278	0.58267		STRG.3964.1	-4.03926	6.43278	0.496767
STRG.4240.1	-5.70207	6.65254	0.260517		STRG.4240.1	2.38838	6.65254	1
STRG.4368.1	-5.79206	6.6678	0.248189		STRG.4368.1	2.02331	6.6678	1
STRG.4574.1	-4.55719	6.36931	0.437466		STRG.4574.1	2.95706	6.36931	0.72178
STRG.4628.1	-4.59828	6.44888	0.393594		STRG.4628.1	3.49228	6.44888	0.58267
STRG.4893.1	-4.64774	6.79836	0.393594		STRG.4893.1	-5.00308	6.79836	0.33224
STRG.4910.1	-3.64564	6.40845	0.58267		STRG.4910.1	-4.10939	6.40845	0.496767
STRG.4911.1	-1.77083	6.63269	0.665031		STRG.4911.1	0	6.63269	1
STRG.4969.1	-2.29201	6.35219	1		STRG.4969.1	4.19678	6.35219	0.496767
STRG.5491.1	-4.82382	6.50607	0.359563		STRG.5491.1	-3.60643	6.50607	0.58267
STRG.5982.1	-3.80575	6.34292	0.58267		STRG.5982.1	-3.69872	6.34292	0.58267
STRG.6244.1	-4.05184	6.62359	0.390163		STRG.6244.1	0	6.62359	1
rna23257	-1.79507	5.93904	1		rna23257	1.18055	5.93904	1
STRG.6594.2	-11.7706	15.2737	0.00990429		STRG.6594.2	0	15.2737	1
STRG.6696.1	-3.83017	6.16577	0.58267		STRG.6696.1	-2.18035	6.16577	1
STRG.7001.1	1.57468	6.61268	0.665031		STRG.7001.1	0	6.61268	1
STRG.7429.1	-4.52122	6.30249	0.437466		STRG.7429.1	2.32057	6.30249	1
rna29245	-3.68314	6.20675	0.58267		rna29245	-2.86204	6.20675	0.72178
rna30107	-0.799393	6.2117	1		rna30107	0	6.2117	1
STRG.8293.1	-2.09631	6.18417	1		STRG.8293.1	3.49302	6.18417	0.58267
STRG.8361.1	-7.52405	10.5141	0.117234		STRG.8361.1	10.0543	10.5141	0.0387642
STRG.8379.1	-0.0164203	6.94549	1		STRG.8379.1	0	6.94549	1
STRG.8517.1	-3.99761	6.44929	0.496767		STRG.8517.1	-4.09955	6.44929	0.496767
rna34006	-2.18963	5.98668	1		rna34006	1.7362	5.98668	1
STRG.10305.1	-3.6488	6.20482	0.58267		STRG.10305.1	2.82425	6.20482	1
STRG.10458.1	0.305362	6.60485	1		STRG.10458.1	0	6.60485	1
STRG.10505.4	-3.82776	6.13756	0.58267		STRG.10505.4	1.70005	6.13756	1
STRG.10704.1	0.422184	6.23356	1		STRG.10704.1	0	6.23356	1
rna39720	0.0519803	6.02096	1		rna39720	0	6.02096	1
STRG.10922.1	1.0263	6.87673	0.770426		STRG.10922.1	0	6.87673	1
STRG.11251.1	-8.6279	10.7177	0.0725845		STRG.11251.1	-10.1338	10.7177	0.0375071
STRG.11256.1	-3.99744	7.29944	0.302205		STRG.11256.1	0	7.29944	1
STRG.12269.1	-3.57213	6.22818	0.58267		STRG.12269.1	3.08455	6.22818	0.72178
STRG.12333.1	-2.68009	6.54645	1		STRG.12333.1	4.76559	6.54645	0.393594
STRG.12804.1	4.35524	8.02671	0.23701		STRG.12804.1	0	8.02671	1
rna47589	0.182242	6.16376	1		rna47589	0	6.16376	1
STRG.13099.1	-0.413714	6.17221	1		STRG.13099.1	0	6.17221	1
STRG.13273.1	-2.71844	6.34918	1		STRG.13273.1	4.10206	6.34918	0.496767
STRG.13337.1	0.37335	6.27597	1		STRG.13337.1	0	6.27597	1
STRG.14095.1	-5.32163	6.58947	0.309722		STRG.14095.1	3.17795	6.58947	0.72178
STRG.14181.1	0.415376	7.39608	0.898419		STRG.14181.1	0	7.39608	1
STRG.14459.1	-1.712	6.17295	0.733968		STRG.14459.1	0	6.17295	1
STRG.14527.2	-3.06271	6.07396	0.72178		STRG.14527.2	2.10846	6.07396	1
STRG.14571.1	1.3671	6.54833	0.733968		STRG.14571.1	4.14485	6.54833	0.496767
STRG.14609.1	-4.06678	6.27504	0.496767		STRG.14609.1	2.91934	6.27504	0.72178
STRG.14652.1	-1.69157	6.51978	0.641027		STRG.14652.1	0	6.51978	1
STRG.14683.1	-0.453368	6.3751	0.914066		STRG.14683.1	0	6.3751	1
STRG.15461.1	-1.83168	6.2792	0.656827		STRG.15461.1	0	6.2792	1
STRG.16337.1	-4.7028	6.40421	0.393594		STRG.16337.1	2.98559	6.40421	0.72178
STRG.16437.1	-7.62064	7.83174	0.112528		STRG.16437.1	4.51738	7.83174	0.437466
STRG.16982.1	-3.77642	6.33894	0.58267		STRG.16982.1	3.62661	6.33894	0.58267
STRG.17112.1	1.23679	6.85062	0.715987		STRG.17112.1	0	6.85062	1
STRG.17114.1	1.53046	6.5092	0.741126		STRG.17114.1	0	6.5092	1
STRG.17864.1	-3.04467	6.84472	0.427556		STRG.17864.1	0	6.84472	1
STRG.18486.4	-3.26977	6.11829	0.72178		STRG.18486.4	-2.45229	6.11829	1
STRG.19160.1	-2.17026	6.35214	1		STRG.19160.1	4.21538	6.35214	0.496767
STRG.19375.3	-2.2757	6.03053	1		STRG.19375.3	2.26323	6.03053	1
STRG.19508.1	-4.1649	6.4891	0.496767		STRG.19508.1	-4.17036	6.4891	0.496767
STRG.19926.1	-4.96228	7.08092	0.359563		STRG.19926.1	5.55418	7.08092	0.274571
STRG.20398.1	-4.34212	6.32083	0.437466		STRG.20398.1	2.90432	6.32083	0.72178
STRG.20581.1	-0.232283	6.13782	1		STRG.20581.1	0	6.13782	1
STRG.20581.2	-1.18235	6.043	1		STRG.20581.2	0	6.043	1
STRG.20607.1	-4.83039	8.40996	0.359563		STRG.20607.1	-4.23887	8.40996	0.221836
STRG.20616.1	-4.29404	7.32189	0.496767		STRG.20616.1	-6.27163	7.32189	0.203538
STRG.20622.1	-4.68182	6.52569	0.393594		STRG.20622.1	-3.90668	6.52569	0.58267
STRG.20638.2	-3.0253	6.07154	0.72178		STRG.20638.2	2.12088	6.07154	1
STRG.20806.1	-3.79502	6.22471	0.58267		STRG.20806.1	-2.88956	6.22471	0.72178
STRG.20837.1	-4.84657	6.51612	0.359563		STRG.20837.1	-3.63746	6.51612	0.58267
STRG.20843.1	-6.77914	7.21222	0.162367		STRG.20843.1	3.27401	7.21222	0.72178
STRG.20859.1	-6.76079	7.62791	0.162367		STRG.20859.1	-5.7347	7.62791	0.248189
STRG.20860.1	-4.423	6.76324	0.437466		STRG.20860.1	-5.00379	6.76324	0.33224
STRG.20887.1	-4.02309	6.57829	0.496767		STRG.20887.1	-4.59095	6.57829	0.393594
STRG.20903.1	-3.16394	6.43203	0.72178		STRG.20903.1	-4.37879	6.43203	0.437466
STRG.20905.1	-3.62574	6.32924	0.58267		STRG.20905.1	-3.74234	6.32924	0.58267
STRG.20934.1	-3.89595	6.63933	0.58267		STRG.20934.1	-4.83691	6.63933	0.359563
STRG.20960.1	-4.37894	6.64291	0.437466		STRG.20960.1	-4.64156	6.64291	0.393594
STRG.20969.1	-4.98178	6.56452	0.359563		STRG.20969.1	-3.73838	6.56452	0.58267
STRG.20977.1	0.199198	6.86758	1		STRG.20977.1	0	6.86758	1
STRG.21007.1	-3.61575	6.31425	0.58267		STRG.21007.1	-3.66747	6.31425	0.58267
STRG.20491.1	-4.61217	6.84605	0.393594		STRG.20491.1	-5.15762	6.84605	0.33224
rna76468	-0.565734	7.01897	0.930201		rna76468	1.21523	7.01897	0.845318
STRG.20567.1	-5.85661	7.37401	0.237268		STRG.20567.1	-5.85643	7.37401	0.237268
STRG.20568.1	-4.81794	7.09943	0.359563		STRG.20568.1	-5.70816	7.09943	0.260517
STRG.20582.1	-3.97645	6.37118	0.496767		STRG.20582.1	-3.72792	6.37118	0.58267
STRG.20627.1	-3.85594	7.30104	0.58267		STRG.20627.1	-6.29591	7.30104	0.196908
STRG.20700.1	-4.5471	6.52036	0.437466		STRG.20700.1	-4.01684	6.52036	0.496767
rna77507	0.675554	8.12861	0.832805		rna77507	5.68662	8.12861	0.260517
rna77508	-0.227855	6.16544	1		rna77508	1.90722	6.16544	1
STRG.21070.1	0.592408	6.31112	1		STRG.21070.1	0	6.31112	1
STRG.164.1	7.12955	16.6488	0.137561		STRG.164.1	-16.3895	16.6488	0.00247085
STRG.812.1	4.5177	6.54709	0.437466		STRG.812.1	-4.12395	6.54709	0.496767
STRG.2158.1	3.67783	6.41876	0.58267		STRG.2158.1	-4.10625	6.41876	0.496767
STRG.3527.1	-2.56274e-15	6.1754	1		STRG.3527.1	0.218266	6.1754	1
STRG.3584.1	7.92991	8.02751	0.0976865		STRG.3584.1	-4.34529	8.02751	0.437466
STRG.3644.1	3.23779	6.2091	0.72178		STRG.3644.1	-3.21409	6.2091	0.72178
ENST00000248564.5	2.70198	6.10735	1		ENST00000248564.5	-0.88729	6.10735	1
DUF1084	3.76619	6.95171	0.58267		DUF1084	-0.296497	6.95171	1
STRG.3946.1	3.87207	6.51766	0.58267		STRG.3946.1	-4.41349	6.51766	0.437466
rna18161	-2.56274e-15	6.05907	1		rna18161	-0.944398	6.05907	1
STRG.4856.1	5.93123	6.95603	0.227512		STRG.4856.1	-0.608525	6.95603	1
STRG.4971.2	2.67758	6.03681	1		STRG.4971.2	-1.98142	6.03681	1
STRG.5240.1	4.53593	6.47084	0.437466		STRG.5240.1	-3.70058	6.47084	0.58267
STRG.5597.1	3.68141	6.35433	0.58267		STRG.5597.1	-3.79787	6.35433	0.58267
STRG.6060.1	-2.56274e-15	6.42777	1		STRG.6060.1	-0.593282	6.42777	0.888251
STRG.6179.1	3.03438	6.44419	0.72178		STRG.6179.1	-4.43741	6.44419	0.437466
STRG.7350.1	3.26411	6.60029	0.72178		STRG.7350.1	-4.87753	6.60029	0.359563
STRG.7574.1	5.54579	6.7912	0.274571		STRG.7574.1	-4.06789	6.7912	0.496767
STRG.7695.1	2.49118	6.4887	1		STRG.7695.1	-4.68875	6.4887	0.393594
STRG.7875.2	3.35029	6.19372	0.72178		STRG.7875.2	-3.01074	6.19372	0.72178
STRG.7939.1	-2.56274e-15	8.27129	1		STRG.7939.1	-2.23744	8.27129	0.506924
STRG.9287.1	-2.56274e-15	7.50563	1		STRG.9287.1	2.28484	7.50563	0.509588
STRG.10362.1	2.62651	6.52717	1		STRG.10362.1	-4.78297	6.52717	0.393594
STRG.10477.2	2.44275	6.02119	1		STRG.10477.2	-1.99359	6.02119	1
gene17129	-2.56274e-15	6.46634	1		gene17129	0.230152	6.46634	1
STRG.11052.1	-2.56274e-15	6.48516	1		STRG.11052.1	-0.731263	6.48516	0.888251
STRG.11295.1	3.03638	6.1067	0.72178		STRG.11295.1	-2.48826	6.1067	1
STRG.12588.1	-2.56274e-15	6.63537	1		STRG.12588.1	-0.170592	6.63537	1
STRG.12596.1	-2.56274e-15	6.93817	1		STRG.12596.1	0.98972	6.93817	0.779937
STRG.14387.1	-2.56274e-15	6.42409	1		STRG.14387.1	-1.32235	6.42409	0.888251
STRG.15389.3	-2.56274e-15	6.88817	1		STRG.15389.3	-2.47486	6.88817	0.543039
STRG.16256.1	3.42441	8.72945	0.72178		STRG.16256.1	-8.25394	8.72945	0.0848276
sp|Q0VC16|TGO1_BOVIN	-2.56274e-15	6.35001	1		sp|Q0VC16|TGO1_BOVIN	-2.25696	6.35001	0.733968
STRG.19536.1	-2.56274e-15	6.95704	1		STRG.19536.1	-2.58114	6.95704	0.518235
STRG.19626.1	4.80017	12.7432	0.359563		STRG.19626.1	-12.471	12.7432	0.0135728
STRG.19854.1	2.01724	6.00746	1		STRG.19854.1	-2.13714	6.00746	1
STRG.19870.1	5.11608	6.68489	0.33224		STRG.19870.1	-4.15602	6.68489	0.496767
STRG.20512.1	4.16336	6.38514	0.496767		STRG.20512.1	-3.58879	6.38514	0.58267
STRG.20601.1	-2.56274e-15	8.4683	1		STRG.20601.1	-2.7974	8.4683	0.394186
STRG.20694.1	4.46394	6.61298	0.437466		STRG.20694.1	-4.448	6.61298	0.437466
STRG.20847.1	-2.56274e-15	6.62097	1		STRG.20847.1	-1.1595	6.62097	0.738665
STRG.20858.1	3.9455	6.73058	0.496767		STRG.20858.1	-5.06582	6.73058	0.33224
STRG.20971.1	3.5987	6.26552	0.58267		STRG.20971.1	-3.33215	6.26552	0.72178
STRG.21023.1	5.44656	7.13985	0.290777		STRG.21023.1	-5.49506	7.13985	0.274571
rna77710	1.57449	5.97995	1		rna77710	-2.02329	5.97995	1
STRG.21081.1	4.81491	6.52333	0.359563		STRG.21081.1	-3.654	6.52333	0.58267
STRG.779.1	3.17808	6.09925	0.72178		STRG.779.1	2.19005	6.09925	1
STRG.1058.1	13.8656	13.4296	0.00742785		STRG.1058.1	5.56504	13.4296	0.274571
STRG.2781.1	5.3205	6.65745	0.290777		STRG.2781.1	3.605	6.65745	0.58267
STRG.3175.1	2.5019	6.13774	1		STRG.3175.1	3.0504	6.13774	0.72178
STRG.3281.1	5.38729	6.65736	0.290777		STRG.3281.1	3.45606	6.65736	0.72178
STRG.4589.1	4.41404	6.3886	0.437466		STRG.4589.1	3.25048	6.3886	0.72178
STRG.6629.1	5.16496	6.68116	0.309722		STRG.6629.1	4.01165	6.68116	0.496767
STRG.7833.1	3.32444	6.23996	0.72178		STRG.7833.1	3.29527	6.23996	0.72178
STRG.9434.1	4.40066	6.47755	0.437466		STRG.9434.1	3.81712	6.47755	0.58267
rna31496	1.34768	5.93159	1		rna31496	1.30375	5.93159	1
STRG.9759.1	3.11664	6.16124	0.72178		STRG.9759.1	2.87271	6.16124	0.72178
rna34005	2.13236	6.00352	1		rna34005	1.95788	6.00352	1
STRG.10616.1	3.5686	6.25375	0.58267		STRG.10616.1	3.20946	6.25375	0.72178
STRG.11004.1	5.15592	6.45043	0.33224		STRG.11004.1	1.81677	6.45043	1
STRG.12400.1	3.65562	6.37144	0.58267		STRG.12400.1	3.8269	6.37144	0.58267
STRG.12595.1	3.51919	6.30265	0.58267		STRG.12595.1	3.54811	6.30265	0.58267
STRG.13102.1	4.25727	6.32264	0.496767		STRG.13102.1	2.95799	6.32264	0.72178
STRG.13256.1	3.4459	6.26025	0.72178		STRG.13256.1	3.34353	6.26025	0.72178
STRG.13267.1	3.69994	6.61097	0.58267		STRG.13267.1	4.72262	6.61097	0.393594
STRG.14573.1	3.50815	6.20516	0.58267		STRG.14573.1	2.89704	6.20516	0.72178
STRG.14836.1	5.2777	6.50248	0.309722		STRG.14836.1	2.08764	6.50248	1
STRG.14975.1	3.72003	6.2748	0.58267		STRG.14975.1	3.22554	6.2748	0.72178
STRG.15205.1	3.15528	6.34172	0.72178		STRG.15205.1	3.91837	6.34172	0.58267
STRG.16864.1	4.26879	6.38724	0.496767		STRG.16864.1	3.42493	6.38724	0.72178
STRG.17974.1	4.29938	6.38356	0.437466		STRG.17974.1	3.36472	6.38356	0.72178
STRG.18253.1	4.77717	6.47589	0.393594		STRG.18253.1	3.32837	6.47589	0.72178
STRG.18501.1	4.46425	6.31337	0.437466		STRG.18501.1	2.45118	6.31337	1
STRG.18612.1	3.40844	12.4504	0.72178		STRG.18612.1	12.1763	12.4504	0.0154246
STRG.19579.1	5.37701	6.53191	0.290777		STRG.19579.1	2.02781	6.53191	1
STRG.19649.1	5.2878	6.56935	0.309722		STRG.19649.1	2.94654	6.56935	0.72178
STRG.19683.1	4.22667	6.34494	0.496767		STRG.19683.1	3.18081	6.34494	0.72178
STRG.19684.1	4.21152	6.60612	0.496767		STRG.19684.1	4.50194	6.60612	0.437466
STRG.19685.1	6.2371	7.17046	0.203538		STRG.19685.1	4.71081	7.17046	0.393594
STRG.20030.1	4.05205	6.31062	0.496767		STRG.20030.1	3.14081	6.31062	0.72178
STRG.22690.1	3.04779	6.19277	0.72178		STRG.22690.1	3.15395	6.19277	0.72178
STRG.22932.1	3.80761	6.14314	0.58267		STRG.22932.1	1.66071	6.14314	1
STRG.23425.1	5.92575	7.44609	0.227512		STRG.23425.1	5.92353	7.44609	0.227512
STRG.23437.1	3.6015	6.22497	0.58267		STRG.23437.1	2.9668	6.22497	0.72178
STRG.23481.1	3.71916	6.81017	0.58267		STRG.23481.1	5.26142	6.81017	0.309722
STRG.23485.1	4.41478	6.7164	0.437466		STRG.23485.1	4.77394	6.7164	0.393594
STRG.23487.1	4.3191	6.60096	0.437466		STRG.23487.1	4.4241	6.60096	0.437466
STRG.23548.1	3.84324	6.8246	0.58267		STRG.23548.1	5.26894	6.8246	0.309722
STRG.23715.1	3.5051	8.65187	0.58267		STRG.23715.1	8.13876	8.65187	0.0894188
STRG.23737.1	4.55644	7.2574	0.393594		STRG.23737.1	6.0431	7.2574	0.218732
STRG.23798.1	5.91067	6.8383	0.237268		STRG.23798.1	3.4376	6.8383	0.72178
STRG.23806.1	7.84509	7.90602	0.100912		STRG.23806.1	3.45515	7.90602	0.72178
STRG.23837.1	4.32205	6.44854	0.437466		STRG.23837.1	3.73536	6.44854	0.58267
STRG.23865.1	4.32329	6.32291	0.437466		STRG.23865.1	2.85111	6.32291	0.72178
STRG.23925.1	5.23933	6.60285	0.309722		STRG.23925.1	3.37794	6.60285	0.72178
rna76933	5.53354	7.24676	0.274571		rna76933	5.66787	7.24676	0.260517
STRG.23950.1	5.12168	6.63962	0.33224		STRG.23950.1	3.84358	6.63962	0.58267
STRG.23979.1	4.04363	6.41218	0.496767		STRG.23979.1	3.77772	6.41218	0.58267
STRG.23980.1	3.6207	6.97429	0.58267		STRG.23980.1	5.64893	6.97429	0.260517
STRG.24041.1	4.55323	6.38258	0.393594		STRG.24041.1	2.97466	6.38258	0.72178
STRG.24045.1	4.6211	6.59925	0.393594		STRG.24045.1	4.20605	6.59925	0.496767
STRG.24046.1	3.71225	6.33489	0.58267		STRG.24046.1	3.60239	6.33489	0.58267
STRG.24058.1	3.93365	6.40863	0.496767		STRG.24058.1	3.83833	6.40863	0.58267
STRG.24067.1	2.65839	6.37341	1		STRG.24067.1	4.19091	6.37341	0.496767
STRG.24068.1	4.38805	6.54009	0.437466		STRG.24068.1	4.12986	6.54009	0.496767
STRG.24119.1	4.98929	6.76586	0.33224		STRG.24119.1	4.57864	6.76586	0.393594
STRG.24141.1	5.06253	6.87494	0.33224		STRG.24141.1	4.90729	6.87494	0.359563
STRG.24161.1	3.1024	6.47989	0.72178		STRG.24161.1	4.46642	6.47989	0.437466
STRG.24175.1	4.26769	6.46065	0.496767		STRG.24175.1	3.84785	6.46065	0.58267
STRG.24200.1	4.9448	6.53045	0.359563		STRG.24200.1	3.43189	6.53045	0.72178
STRG.24201.1	8.23184	8.30073	0.0855502		STRG.24201.1	4.94566	8.30073	0.359563
STRG.24217.1	4.1475	6.45662	0.496767		STRG.24217.1	3.92247	6.45662	0.58267
STRG.24219.1	6.10077	7.07825	0.218732		STRG.24219.1	4.51955	7.07825	0.437466
STRG.24220.1	4.48116	6.40731	0.437466		STRG.24220.1	3.29152	6.40731	0.72178
STRG.24231.1	3.97766	6.40388	0.496767		STRG.24231.1	3.78372	6.40388	0.58267
STRG.24239.1	4.17156	7.23172	0.496767		STRG.24239.1	6.06852	7.23172	0.218732
STRG.24248.1	4.20762	6.33833	0.496767		STRG.24248.1	3.15584	6.33833	0.72178
STRG.24250.1	5.57595	6.68935	0.274571		STRG.24250.1	3.20241	6.68935	0.72178
STRG.24256.1	5.22533	6.73884	0.309722		STRG.24256.1	4.223	6.73884	0.496767
STRG.24257.1	4.85359	6.50099	0.359563		STRG.24257.1	3.38042	6.50099	0.72178
STRG.24257.2	3.22213	6.21025	0.72178		STRG.24257.2	3.16484	6.21025	0.72178
STRG.24257.3	2.2707	6.08399	1		STRG.24257.3	2.73938	6.08399	1
STRG.24260.1	5.92715	6.8871	0.227512		STRG.24260.1	3.77739	6.8871	0.58267
STRG.24262.1	3.57837	6.3867	0.58267		STRG.24262.1	3.93918	6.3867	0.496767
STRG.24263.1	2.68086	6.39824	1		STRG.24263.1	4.27781	6.39824	0.437466
STRG.24298.1	7.36769	7.6079	0.124379		STRG.24298.1	3.74199	7.6079	0.58267
STRG.24312.1	4.9746	6.6653	0.359563		STRG.24312.1	4.16747	6.6653	0.496767
STRG.24330.1	6.90689	7.31053	0.151783		STRG.24330.1	3.43461	7.31053	0.72178
STRG.24331.1	3.53798	6.39356	0.58267		STRG.24331.1	3.98912	6.39356	0.496767
STRG.23618.1	5.43922	7.13549	0.290777		STRG.23618.1	5.43392	7.13549	0.290777
STRG.23680.1	3.72466	6.35987	0.58267		STRG.23680.1	3.7279	6.35987	0.58267
STRG.23691.1	5.34392	6.61874	0.290777		STRG.23691.1	3.2501	6.61874	0.72178
STRG.24083.1	4.23229	6.39604	0.496767		STRG.24083.1	3.51997	6.39604	0.58267
STRG.24294.1	4.33233	6.73521	0.437466		STRG.24294.1	4.87048	6.73521	0.359563
STRG.24295.1	4.194	6.51302	0.496767		STRG.24295.1	4.14722	6.51302	0.496767
STRG.24419.1	10.6013	10.232	0.0306924		STRG.24419.1	2.53589	10.232	1
STRG.24420.1	7.79236	7.86944	0.103221		STRG.24420.1	3.46169	7.86944	0.72178
STRG.24433.1	3.65694	6.75988	0.58267		STRG.24433.1	5.14976	6.75988	0.33224
